# Supplementary material for: Analysis of Drug Metabolizing Gene Panel in Osteosarcoma Patients Identifies Association Between Variants in SULT1E1, CYP2B6 and CYP4F8 and Methotrexate Levels and Toxicities
Source: PubMed Central journal article supplement (PMC7435008; doi:10.3389/fphar.2020.01241), 2020-08-12
Supplement: DataSheet_1.pdf [file DataSheet_1.pdf]

**Table S1. 545 genetic variants in 176 genes included in genetic association analyses**

| Gene          | SNP        | Gene           | SNP        | Gene           | SNP        | Gene         | SNP        | Gene           | SNP        | Gene           | SNP        |
|---------------|------------|----------------|------------|----------------|------------|--------------|------------|----------------|------------|----------------|------------|
| <i>ABCB1</i>  | rs10276036 | <i>ADH7</i>    | rs1573496  | <i>CYP19A1</i> | rs700518   | <i>EPHX1</i> | rs1051740  | <i>PPARD</i>   | rs1003973  | <i>SLC7A7</i>  | rs1805059  |
| <i>ABCB1</i>  | rs1045642  | <i>ADH7</i>    | rs971074   | <i>CYP1A2</i>  | rs2470890  | <i>EPHX1</i> | rs1051741  | <i>PPARD</i>   | rs1883322  | <i>SLC7A7</i>  | rs1805061  |
| <i>ABCB1</i>  | rs1128503  | <i>AHR</i>     | rs10249788 | <i>CYP1A2</i>  | rs35694136 | <i>EPHX1</i> | rs2292566  | <i>PPARD</i>   | rs2038067  | <i>SLC7A7</i>  | rs2281677  |
| <i>ABCB1</i>  | rs17064    | <i>AHR</i>     | rs2066853  | <i>CYP1A2</i>  | rs762551   | <i>EPHX2</i> | rs41507953 | <i>PPARD</i>   | rs2076167  | <i>SLC7A7</i>  | rs8018462  |
| <i>ABCB1</i>  | rs2032588  | <i>AKAP9</i>   | rs2049900  | <i>CYP1B1</i>  | rs1056836  | <i>FAAH</i>  | rs324420   | <i>PPARD</i>   | rs2267665  | <i>SLC7A8</i>  | rs1884545  |
| <i>ABCB1</i>  | rs2214102  | <i>AKAP9</i>   | rs7785971  | <i>CYP1B1</i>  | rs1056837  | <i>FMO1</i>  | rs1126692  | <i>PPARD</i>   | rs2267667  | <i>SLC7A8</i>  | rs2236135  |
| <i>ABCB1</i>  | rs2235013  | <i>ALB</i>     | rs3756067  | <i>CYP1B1</i>  | rs1800440  | <i>FMO1</i>  | rs12954    | <i>PPARD</i>   | rs2267668  | <i>SLC7A8</i>  | rs2268873  |
| <i>ABCB1</i>  | rs2235033  | <i>ALDH1A1</i> | rs13959    | <i>CYP20A1</i> | rs1048013  | <i>FMO1</i>  | rs742350   | <i>PPARD</i>   | rs2267669  | <i>SLC7A8</i>  | rs2268877  |
| <i>ABCB1</i>  | rs2235040  | <i>ALDH2</i>   | rs886205   | <i>CYP24A1</i> | rs2296241  | <i>FMO1</i>  | rs7877     | <i>PPARD</i>   | rs6457816  | <i>SLC7A8</i>  | rs7141505  |
| <i>ABCB1</i>  | rs3842     | <i>ALDH3A1</i> | rs887241   | <i>CYP24A1</i> | rs2762934  | <i>FMO2</i>  | rs2020860  | <i>PPARD</i>   | rs6901410  | <i>SLC7A8</i>  | rs8013529  |
| <i>ABCB1</i>  | rs9282564  | <i>AOX1</i>    | rs11678615 | <i>CYP24A1</i> | rs6068816  | <i>FMO2</i>  | rs2020861  | <i>PPARD</i>   | rs6906237  | <i>SLC7A8</i>  | rs910795   |
| <i>ABCB11</i> | rs2287622  | <i>AOX1</i>    | rs11684227 | <i>CYP26A1</i> | rs10882140 | <i>FMO2</i>  | rs2020863  | <i>PPARD</i>   | rs6922548  | <i>SLCO1A2</i> | rs10841795 |
| <i>ABCB11</i> | rs3755163  | <i>AOX1</i>    | rs16834034 | <i>CYP26A1</i> | rs4418728  | <i>FMO2</i>  | rs2020865  | <i>PPARD</i>   | rs7739752  | <i>SLCO1A2</i> | rs4078     |
| <i>ABCB11</i> | rs3770602  | <i>AOX1</i>    | rs3731722  | <i>CYP26A1</i> | rs7905939  | <i>FMO2</i>  | rs2020868  | <i>PPARD</i>   | rs7751481  | <i>SLCO1A2</i> | rs7957203  |
| <i>ABCB11</i> | rs3770603  | <i>AOX1</i>    | rs6729738  | <i>CYP2A13</i> | rs1709082  | <i>FMO2</i>  | rs2020869  | <i>PPARG</i>   | rs1152003  | <i>SLCO1B1</i> | rs11045819 |
| <i>ABCB11</i> | rs4148768  | <i>AOX1</i>    | rs7563682  | <i>CYP2A6</i>  | rs1137115  | <i>FMO2</i>  | rs2020870  | <i>PPARG</i>   | rs1801282  | <i>SLCO1B1</i> | rs2291075  |
| <i>ABCB11</i> | rs4148771  | <i>APOA2</i>   | rs5085     | <i>CYP2A6</i>  | rs28399433 | <i>FMO2</i>  | rs2307492  | <i>PPARG</i>   | rs3856806  | <i>SLCO1B1</i> | rs2306283  |
| <i>ABCB11</i> | rs4148771  | <i>ARNT</i>    | rs2228099  | <i>CYP2A6</i>  | rs4803381  | <i>FMO2</i>  | rs28369860 | <i>PPARG</i>   | rs9833097  | <i>SLCO1B1</i> | rs4149056  |
| <i>ABCB11</i> | rs4148776  | <i>ARSA</i>    | rs131713   | <i>CYP2A6</i>  | rs8192729  | <i>FMO2</i>  | rs7512785  | <i>PTGIS</i>   | rs5629     | <i>SLCO1B1</i> | rs4149057  |
| <i>ABCB11</i> | rs4668115  | <i>ARSA</i>    | rs743616   | <i>CYP2A7</i>  | rs3869579  | <i>FMO2</i>  | rs7515157  | <i>QPRT</i>    | rs13331798 | <i>SLCO1B3</i> | rs2053098  |
| <i>ABCB11</i> | rs473351   | <i>ATP7B</i>   | rs1051332  | <i>CYP2B6</i>  | rs2279343  | <i>FMO3</i>  | rs1736557  | <i>QPRT</i>    | rs3862476  | <i>SLCO1B3</i> | rs3764006  |
| <i>ABCB11</i> | rs495714   | <i>ATP7B</i>   | rs1061472  | <i>CYP2B6</i>  | rs3745274  | <i>FMO3</i>  | rs1800822  | <i>RALBP1</i>  | rs10898    | <i>SLCO1B3</i> | rs4149117  |
| <i>ABCB11</i> | rs496550   | <i>ATP7B</i>   | rs1801243  | <i>CYP2B6</i>  | rs4803418  | <i>FMO3</i>  | rs2066534  | <i>RALBP1</i>  | rs12680    | <i>SLCO1B3</i> | rs7311358  |
| <i>ABCB11</i> | rs497692   | <i>ATP7B</i>   | rs1801244  | <i>CYP2B6</i>  | rs4803419  | <i>FMO3</i>  | rs2266780  | <i>RALBP1</i>  | rs3322     | <i>SLCO3A1</i> | rs1517618  |
| <i>ABCB11</i> | rs7602171  | <i>ATP7B</i>   | rs1801249  | <i>CYP2B6</i>  | rs8192719  | <i>FMO3</i>  | rs2266782  | <i>RPL13</i>   | rs9930567  | <i>SLCO3A1</i> | rs2190748  |
| <i>ABCB4</i>  | rs1202283  | <i>ATP7B</i>   | rs2277448  | <i>CYP2C18</i> | rs2281891  | <i>FMO3</i>  | rs909530   | <i>SLC10A1</i> | rs4646285  | <i>SLCO3A1</i> | rs2283458  |
| <i>ABCB4</i>  | rs2097937  | <i>ATP7B</i>   | rs732774   | <i>CYP2C18</i> | rs2860840  | <i>FMO4</i>  | rs2223477  | <i>SLC10A2</i> | rs188096   | <i>SLCO3A1</i> | rs3743369  |
| <i>ABCB4</i>  | rs2109505  | <i>CA5P</i>    | rs11150564 | <i>CYP2C19</i> | rs12248560 | <i>FMO5</i>  | rs894469   | <i>SLC10A2</i> | rs2301157  | <i>SLCO3A1</i> | rs960440   |
| <i>ABCB4</i>  | rs2230028  | <i>CA5P</i>    | rs11859842 | <i>CYP2C19</i> | rs4244285  | <i>FMO6</i>  | rs1736565  | <i>SLC10A2</i> | rs2301159  | <i>SLCO4A1</i> | rs2236553  |

|              |            |                |            |                |            |              |            |                 |            |                |             |
|--------------|------------|----------------|------------|----------------|------------|--------------|------------|-----------------|------------|----------------|-------------|
| <i>ABCB4</i> | rs2302387  | <i>CA5P</i>    | rs1364182  | <i>CYP2C8</i>  | rs10509681 | <i>FMO6</i>  | rs7886938  | <i>SLC10A2</i>  | rs279941   | <i>SLCO4A1</i> | rs3787537   |
| <i>ABCB4</i> | rs3747806  | <i>CBR1</i>    | rs1005695  | <i>CYP2C8</i>  | rs1058930  | <i>FMO6</i>  | rs7889839  | <i>SLC10A2</i>  | rs279942   | <i>SLCO5A1</i> | rs1138541   |
| <i>ABCB4</i> | rs4148805  | <i>CBR1</i>    | rs2835265  | <i>CYP2C8</i>  | rs11572080 | <i>GSTA1</i> | rs4715332  | <i>SLC10A2</i>  | rs3803258  | <i>SLCO5A1</i> | rs16936279  |
| <i>ABCB4</i> | rs4148808  | <i>CBR1</i>    | rs3787728  | <i>CYP2D6</i>  | rs1058164  | <i>GSTA2</i> | rs1803684  | <i>SLC10A2</i>  | rs7987433  | <i>SLCO5A1</i> | rs3750266   |
| <i>ABCC1</i> | rs212090   | <i>CBR1</i>    | rs998383   | <i>CYP2D6</i>  | rs1065852  | <i>GSTA2</i> | rs2180314  | <i>SLC13A1</i>  | rs1880179  | <i>SPG7</i>    | rs12960     |
| <i>ABCC1</i> | rs212091   | <i>CBR3</i>    | rs1056892  | <i>CYP2D6</i>  | rs1080983  | <i>GSTA2</i> | rs6577     | <i>SLC13A1</i>  | rs2140516  | <i>SPG7</i>    | rs2292954   |
| <i>ABCC1</i> | rs246221   | <i>CBR3</i>    | rs2835286  | <i>CYP2D6</i>  | rs1080985  | <i>GSTA3</i> | rs512795   | <i>SLC13A1</i>  | rs2204295  | <i>SPN</i>     | rs4788172   |
| <i>ABCC1</i> | rs4148380  | <i>CBR3</i>    | rs8133052  | <i>CYP2D6</i>  | rs1135840  | <i>GSTA4</i> | rs13197674 | <i>SLC13A1</i>  | rs6962039  | <i>SULT1B1</i> | rs11249460  |
| <i>ABCC1</i> | rs8187858  | <i>CCDC101</i> | rs11401    | <i>CYP2D6</i>  | rs16947    | <i>GSTA4</i> | rs1802061  | <i>SLC15A1</i>  | rs1339067  | <i>SULT1B1</i> | rs11731028  |
| <i>ABCC2</i> | rs1137968  | <i>CDA</i>     | rs1048977  | <i>CYP2D6</i>  | rs28360521 | <i>GSTA4</i> | rs367836   | <i>SLC15A1</i>  | rs2297322  | <i>SULT1B1</i> | rs1604741   |
| <i>ABCC2</i> | rs17222723 | <i>CDA</i>     | rs2072671  | <i>CYP2D6</i>  | rs3892097  | <i>GSTA4</i> | rs405729   | <i>SLC15A2</i>  | rs1143670  | <i>SULT1C4</i> | rs1402467   |
| <i>ABCC2</i> | rs2273697  | <i>CDA</i>     | rs818202   | <i>CYP2E1</i>  | rs2070673  | <i>GSTA4</i> | rs7496     | <i>SLC15A2</i>  | rs1143671  | <i>SULT1E1</i> | rs1881668   |
| <i>ABCC2</i> | rs3740066  | <i>CES2</i>    | rs11568311 | <i>CYP2E1</i>  | rs2515641  | <i>GSTA5</i> | rs4715354  | <i>SLC15A2</i>  | rs1143672  | <i>SULT1E1</i> | rs3736599   |
| <i>ABCC2</i> | rs717620   | <i>CES2</i>    | rs11568314 | <i>CYP2F1</i>  | rs305968   | <i>GSTA5</i> | rs7748890  | <i>SLC15A2</i>  | rs2257212  | <i>SULT1E1</i> | rs3775770   |
| <i>ABCC2</i> | rs8187707  | <i>CES2</i>    | rs4783745  | <i>CYP2F1</i>  | rs58285195 | <i>GSTM2</i> | rs530021   | <i>SLC15A2</i>  | rs2293616  | <i>SULT1E1</i> | rs3822172   |
| <i>ABCC3</i> | rs1051640  | <i>CHST1</i>   | rs2028985  | <i>CYP2J2</i>  | rs890293   | <i>GSTM2</i> | rs592792   | <i>SLC16A1</i>  | rs1049434  | <i>SULT2B1</i> | rs1132054   |
| <i>ABCC3</i> | rs11568591 | <i>CHST1</i>   | rs750398   | <i>CYP2S1</i>  | rs338599   | <i>GSTM3</i> | rs1799735  | <i>SLC16A1</i>  | rs12727968 | <i>SULT2B1</i> | rs2302948   |
| <i>ABCC3</i> | rs2277624  | <i>CHST1</i>   | rs895729   | <i>CYP39A1</i> | rs2277119  | <i>GSTM3</i> | rs2234696  | <i>SLC16A1</i>  | rs7169     | <i>SULT2B1</i> | rs2544794   |
| <i>ABCC3</i> | rs4148416  | <i>CHST1</i>   | rs9787901  | <i>CYP39A1</i> | rs7761731  | <i>GSTM3</i> | rs7483     | <i>SLC16A1</i>  | rs9429505  | <i>SULT4A1</i> | rs138056    |
| <i>ABCC4</i> | rs1059751  | <i>CHST10</i>  | rs1530031  | <i>CYP3A4</i>  | rs2242480  | <i>GSTM5</i> | rs11807    | <i>SLC22A1</i>  | rs1867351  | <i>SULT4A1</i> | rs138057    |
| <i>ABCC4</i> | rs1189466  | <i>CHST10</i>  | rs3748930  | <i>CYP3A43</i> | rs17342647 | <i>GSTM5</i> | rs1296954  | <i>SLC22A1</i>  | rs628031   | <i>TPSG1</i>   | rs909921    |
| <i>ABCC4</i> | rs1678339  | <i>CHST10</i>  | rs3828193  | <i>CYP3A43</i> | rs533486   | <i>GSTO1</i> | rs4925     | <i>SLC22A1</i>  | rs683369   | <i>UGT1A1</i>  | rs1042640   |
| <i>ABCC4</i> | rs2274405  | <i>CHST11</i>  | rs2463018  | <i>CYP3A43</i> | rs800667   | <i>GSTP1</i> | rs1138272  | <i>SLC22A1</i>  | rs72552763 | <i>UGT1A1</i>  | rs10929302  |
| <i>ABCC4</i> | rs2274406  | <i>CHST11</i>  | rs2463437  | <i>CYP3A5</i>  | rs776746   | <i>GSTP1</i> | rs1695     | <i>SLC22A11</i> | rs1783811  | <i>UGT1A1</i>  | rs10929303  |
| <i>ABCC4</i> | rs2274407  | <i>CHST11</i>  | rs2468110  | <i>CYP3A7</i>  | rs2257401  | <i>GSTZ1</i> | rs1046428  | <i>SLC22A11</i> | rs2078267  | <i>UGT1A1</i>  | rs111741722 |
| <i>ABCC4</i> | rs3742106  | <i>CHST11</i>  | rs7847     | <i>CYP4A11</i> | rs11211402 | <i>GSTZ1</i> | rs7972     | <i>SLC22A12</i> | rs11231825 | <i>UGT1A1</i>  | rs3755319   |
| <i>ABCC4</i> | rs4148551  | <i>CHST11</i>  | rs903247   | <i>CYP4B1</i>  | rs2297809  | <i>GSTZ1</i> | rs7975     | <i>SLC22A13</i> | rs4679028  | <i>UGT1A1</i>  | rs4124874   |
| <i>ABCC4</i> | rs4148553  | <i>CHST13</i>  | rs1056522  | <i>CYP4B1</i>  | rs2297810  | <i>HMGCR</i> | rs5909     | <i>SLC22A13</i> | rs9842091  | <i>UGT1A1</i>  | rs8330      |
| <i>ABCC5</i> | rs3749442  | <i>CHST13</i>  | rs1873397  | <i>CYP4B1</i>  | rs3215983  | <i>HNMT</i>  | rs1050891  | <i>SLC22A14</i> | rs149738   | <i>UGT1A1</i>  | rs887829    |
| <i>ABCC5</i> | rs3805114  | <i>CHST13</i>  | rs3856650  | <i>CYP4B1</i>  | rs4646487  | <i>HNMT</i>  | rs4245861  | <i>SLC22A14</i> | rs171248   | <i>UGT1A3</i>  | rs6706232   |
| <i>ABCC5</i> | rs562      | <i>CHST13</i>  | rs6783962  | <i>CYP4B1</i>  | rs4646491  | <i>HNMT</i>  | rs4646333  | <i>SLC22A14</i> | rs183574   | <i>UGT1A4</i>  | rs6755571   |
| <i>ABCC5</i> | rs7636910  | <i>CHST2</i>   | rs3755739  | <i>CYP4F11</i> | rs1060463  | <i>MAT1A</i> | rs17102596 | <i>SLC22A2</i>  | rs316003   | <i>UGT1A6</i>  | rs1105880   |

|              |            |                |           |                |            |              |            |                 |            |                |            |
|--------------|------------|----------------|-----------|----------------|------------|--------------|------------|-----------------|------------|----------------|------------|
| <i>ABCC5</i> | rs939336   | <i>CHST2</i>   | rs4683739 | <i>CYP4F11</i> | rs2305801  | <i>MAT1A</i> | rs4934027  | <i>SLC22A2</i>  | rs316019   | <i>UGT1A7</i>  | rs7586110  |
| <i>ABCC6</i> | rs2238472  | <i>CHST2</i>   | rs6664    | <i>CYP4F11</i> | rs3765070  | <i>MAT1A</i> | rs7087728  | <i>SLC22A2</i>  | rs624249   | <i>UGT1A9</i>  | rs3832043  |
| <i>ABCC6</i> | rs8058694  | <i>CHST3</i>   | rs1871450 | <i>CYP4F11</i> | rs8104361  | <i>MAT1A</i> | rs9285726  | <i>SLC22A3</i>  | rs2292334  | <i>UGT2A1</i>  | rs11249454 |
| <i>ABCC6</i> | rs8058696  | <i>CHST3</i>   | rs4148943 | <i>CYP4F12</i> | rs593421   | <i>NAT1</i>  | rs4986993  | <i>SLC22A3</i>  | rs668871   | <i>UGT2A1</i>  | rs2288741  |
| <i>ABCC8</i> | rs757110   | <i>CHST3</i>   | rs4148944 | <i>CYP4F12</i> | rs609290   | <i>NAT2</i>  | rs1041983  | <i>SLC22A4</i>  | rs1050152  | <i>UGT2A1</i>  | rs4148301  |
| <i>ABCG1</i> | rs1044317  | <i>CHST3</i>   | rs4148945 | <i>CYP4F12</i> | rs609636   | <i>NAT2</i>  | rs1208     | <i>SLC22A4</i>  | rs272893   | <i>UGT2A1</i>  | rs4148304  |
| <i>ABCG1</i> | rs1541290  | <i>CHST3</i>   | rs4148946 | <i>CYP4F12</i> | rs688755   | <i>NAT2</i>  | rs1799929  | <i>SLC22A5</i>  | rs1045020  | <i>UGT2B15</i> | rs1902023  |
| <i>ABCG1</i> | rs3788007  | <i>CHST3</i>   | rs4148949 | <i>CYP4F2</i>  | rs2074900  | <i>NAT2</i>  | rs1799930  | <i>SLC22A5</i>  | rs274548   | <i>UGT2B15</i> | rs3100     |
| <i>ABCG1</i> | rs3788010  | <i>CHST3</i>   | rs4148950 | <i>CYP4F2</i>  | rs2108622  | <i>NAT2</i>  | rs1799931  | <i>SLC22A5</i>  | rs274558   | <i>UGT2B15</i> | rs4148269  |
| <i>ABCG1</i> | rs425215   | <i>CHST3</i>   | rs730720  | <i>CYP4F2</i>  | rs3093106  | <i>NAT2</i>  | rs1801280  | <i>SLC22A7</i>  | rs2242416  | <i>UGT2B17</i> | rs28374627 |
| <i>ABCG1</i> | rs492338   | <i>CHST3</i>   | rs731027  | <i>CYP4F2</i>  | rs3093153  | <i>NNMT</i>  | rs2852425  | <i>SLC22A7</i>  | rs2270860  | <i>UGT2B4</i>  | rs1131878  |
| <i>ABCG1</i> | rs914189   | <i>CHST5</i>   | rs2641806 | <i>CYP4F8</i>  | rs2056822  | <i>NQO1</i>  | rs10517    | <i>SLC22A8</i>  | rs2276299  | <i>UGT2B4</i>  | rs13119049 |
| <i>ABCG2</i> | rs2231142  | <i>CHST5</i>   | rs2738792 | <i>CYP4F8</i>  | rs4239614  | <i>NQO1</i>  | rs1800566  | <i>SLC25A27</i> | rs9381468  | <i>UGT2B4</i>  | rs13142440 |
| <i>ABPI</i>  | rs1049793  | <i>COMT</i>    | rs4633    | <i>CYP4F8</i>  | rs4646523  | <i>NQO1</i>  | rs689453   | <i>SLC25A27</i> | rs953062   | <i>UGT2B4</i>  | rs1966151  |
| <i>ABPI</i>  | rs10893    | <i>COMT</i>    | rs4680    | <i>CYP4F8</i>  | rs4808326  | <i>NR1I2</i> | rs2276707  | <i>SLC28A1</i>  | rs2242046  | <i>UGT2B7</i>  | rs28365062 |
| <i>ABPI</i>  | rs12179    | <i>CROT</i>    | rs31651   | <i>CYP4Z1</i>  | rs7512729  | <i>NR1I2</i> | rs3814055  | <i>SLC28A1</i>  | rs2242048  | <i>UGT2B7</i>  | rs7438284  |
| <i>ABPI</i>  | rs12539    | <i>CROT</i>    | rs31652   | <i>CYP51A1</i> | rs7793861  | <i>NR1I2</i> | rs6785049  | <i>SLC28A1</i>  | rs2290272  | <i>UGT2B7</i>  | rs7439366  |
| <i>ADH1A</i> | rs12512110 | <i>CROT</i>    | rs7785206 | <i>CYP51A1</i> | rs7797834  | <i>NR1I3</i> | rs11584174 | <i>SLC28A1</i>  | rs2305367  | <i>UGT2B7</i>  | rs7662029  |
| <i>ADH1A</i> | rs1826909  | <i>CYP11B1</i> | rs1134095 | <i>CYP7A1</i>  | rs12542233 | <i>NR1I3</i> | rs2501870  | <i>SLC28A1</i>  | rs8025045  | <i>UGT2B7</i>  | rs7668258  |
| <i>ADH1A</i> | rs6811453  | <i>CYP11B1</i> | rs4736312 | <i>CYP7A1</i>  | rs13251066 | <i>NR1I3</i> | rs55802895 | <i>SLC28A1</i>  | rs8187758  | <i>VKORC1</i>  | rs17708472 |
| <i>ADH1C</i> | rs1789915  | <i>CYP11B1</i> | rs5297    | <i>CYP7A1</i>  | rs3808607  | <i>NR3C1</i> | rs6196     | <i>SLC28A2</i>  | rs1060896  | <i>VKORC1</i>  | rs2359612  |
| <i>ADH4</i>  | rs1126670  | <i>CYP11B1</i> | rs5303    | <i>CYP7A1</i>  | rs8192879  | <i>PGAP3</i> | rs2952151  | <i>SLC28A3</i>  | rs10868138 | <i>VKORC1</i>  | rs2884737  |
| <i>ADH4</i>  | rs1126671  | <i>CYP11B1</i> | rs7003319 | <i>CYP7B1</i>  | rs6980478  | <i>PON1</i>  | rs854560   | <i>SLC28A3</i>  | rs7853758  | <i>VKORC1</i>  | rs7294     |
| <i>ADH4</i>  | rs1126672  | <i>CYP11B2</i> | rs4543    | <i>CYP7B1</i>  | rs6987861  | <i>PON3</i>  | rs11764079 | <i>SLC28A3</i>  | rs7867504  | <i>VKORC1</i>  | rs8050894  |
| <i>ADH4</i>  | rs3762894  | <i>CYP17A1</i> | rs6162    | <i>CYP8B1</i>  | rs6771233  | <i>PON3</i>  | rs11770903 | <i>SLC5A6</i>   | rs1395     | <i>VKORC1</i>  | rs9923231  |
| <i>ADH5</i>  | rs1154400  | <i>CYP17A1</i> | rs6163    | <i>CYP8B1</i>  | rs6774801  | <i>PON3</i>  | rs13226149 | <i>SLC5A6</i>   | rs7081     | <i>VKORC1</i>  | rs9934438  |
| <i>ADH5</i>  | rs2602836  | <i>CYP17A1</i> | rs743572  | <i>CYP8B1</i>  | rs735320   | <i>PON3</i>  | rs17882539 | <i>SLC6A6</i>   | rs2341970  | <i>XDH</i>     | rs1884725  |
| <i>ADH6</i>  | rs10002894 | <i>CYP19A1</i> | rs10046   | <i>DPYD</i>    | rs17376848 | <i>PON3</i>  | rs2072200  | <i>SLC6A6</i>   | rs9036     | <i>XDH</i>     | rs207440   |
| <i>ADH6</i>  | rs10008281 | <i>CYP19A1</i> | rs1062033 | <i>DPYD</i>    | rs1801265  | <i>POR</i>   | rs17685    | <i>SLC7A5</i>   | rs1060253  | <i>XDH</i>     | rs2295475  |
| <i>ADH6</i>  | rs6830685  | <i>CYP19A1</i> | rs4646    | <i>DPYD</i>    | rs2297595  | <i>POR</i>   | rs6965343  | <i>SLC7A7</i>   | rs1061040  |                |            |

SNP, single nucleotide polymorphism

**Table S2. Genetic variants associated with MTX plasma levels, 48 hours after MTX infusion (P<0.05)**

| Gene            | SNP              | Chr      | Position          | Minor allele | MAF         | Coefficient  | 95% CI       |              | P              |
|-----------------|------------------|----------|-------------------|--------------|-------------|--------------|--------------|--------------|----------------|
| <b>SULT1E1</b>  | <b>rs3736599</b> | <b>4</b> | <b>70,725,821</b> | <b>A</b>     | <b>0.08</b> | <b>-0.31</b> | <b>-0.46</b> | <b>-0.17</b> | <b>0.00003</b> |
| <i>SLC6A6</i>   | rs2341970        | 3        | 14,474,225        | T            | 0.25        | -0.21        | -0.33        | -0.10        | 0.0004         |
| <i>CYP1B1</i>   | rs1056837        | 2        | 38,298,150        | T            | 0.42        | -0.17        | -0.27        | -0.07        | 0.0007         |
| <i>CYP1B1</i>   | rs1056836        | 2        | 38,298,203        | G            | 0.42        | -0.16        | -0.26        | -0.07        | 0.0008         |
| <i>GSTM2</i>    | rs530021         | 1        | 110,210,780       | C            | 0.06        | -0.27        | -0.43        | -0.10        | 0.002          |
| <i>SLC22A2</i>  | rs316003         | 6        | 160,645,832       | G            | 0.19        | -0.18        | -0.30        | -0.06        | 0.003          |
| <i>ABCB11</i>   | rs4148776        | 2        | 169,870,882       | C            | 0.08        | -0.21        | -0.35        | -0.06        | 0.006          |
| <i>CHST1</i>    | rs2028985        | 11       | 45,695,362        | A            | 0.07        | -0.25        | -0.43        | -0.07        | 0.007          |
| <i>CHST10</i>   | rs1530031        | 2        | 101,009,326       | A            | 0.47        | -0.16        | -0.28        | -0.04        | 0.007          |
| <i>CHST10</i>   | rs3828193        | 2        | 101,031,561       | C            | 0.48        | -0.13        | -0.22        | -0.04        | 0.007          |
| <i>CHST10</i>   | rs3748930        | 2        | 101,010,082       | C            | 0.47        | -0.16        | -0.27        | -0.04        | 0.008          |
| <i>PPARD</i>    | rs6901410        | 6        | 35,330,030        | C            | 0.06        | -0.24        | -0.43        | -0.05        | 0.013          |
| <i>GSTP1</i>    | rs1138272        | 11       | 67,353,579        | T            | 0.11        | -0.18        | -0.33        | -0.04        | 0.013          |
| <i>ABCB11</i>   | rs3755163        | 2        | 169,875,539       | A            | 0.05        | -0.21        | -0.37        | -0.04        | 0.017          |
| <i>ABCB11</i>   | rs4148771        | 2        | 169,875,534       | delCT        | 0.05        | -0.20        | -0.37        | -0.03        | 0.020          |
| <i>PPARD</i>    | rs6922548        | 6        | 35,353,523        | G            | 0.06        | -0.22        | -0.40        | -0.03        | 0.022          |
| <i>PPARD</i>    | rs7739752        | 6        | 35,339,035        | T            | 0.06        | -0.22        | -0.40        | -0.03        | 0.022          |
| <i>NR1I2</i>    | rs2276707        | 3        | 119,534,153       | T            | 0.18        | -0.14        | -0.26        | -0.02        | 0.022          |
| <i>CYP2C8</i>   | rs1058930        | 10       | 96,818,119        | G            | 0.06        | 0.45         | 0.05         | 0.85         | 0.026          |
| <i>CYP2S1</i>   | rs338599         | 19       | 41,700,493        | G            | 0.05        | -0.22        | -0.41        | -0.02        | 0.027          |
| <i>SLC22A14</i> | rs149738         | 3        | 38,367,984        | G            | 0.46        | 0.11         | 0.01         | 0.22         | 0.031          |
| <i>SLC22A14</i> | rs183574         | 3        | 38,363,837        | C            | 0.46        | 0.11         | 0.01         | 0.22         | 0.031          |
| <i>SLC22A14</i> | rs171248         | 3        | 38,363,393        | C            | 0.46        | 0.11         | 0.01         | 0.22         | 0.031          |
| <i>GSTM3</i>    | rs1799735        | 1        | 110,280,254       | delAGG       | 0.12        | -0.17        | -0.32        | -0.01        | 0.035          |
| <i>POR</i>      | rs17685          | 7        | 75,616,105        | A            | 0.29        | -0.12        | -0.23        | 0.00         | 0.041          |
| <i>SLC22A2</i>  | rs624249         | 6        | 160,679,400       | T            | 0.42        | 0.14         | 0.01         | 0.28         | 0.042          |
| <i>ABCB4</i>    | rs2097937        | 7        | 87,030,903        | C            | 0.24        | -0.15        | -0.30        | -0.01        | 0.042          |
| <i>ABCB11</i>   | rs4148768        | 2        | 169,887,154       | T            | 0.09        | 0.23         | 0.01         | 0.44         | 0.044          |
| <i>ABCC6</i>    | rs8058696        | 16       | 16,278,869        | C            | 0.42        | -0.10        | -0.20        | 0.00         | 0.044          |
| <i>CYP2D6</i>   | rs1065852        | 22       | 42,526,694        | T            | 0.23        | -0.13        | -0.25        | 0.00         | 0.046          |
| <i>CYP2A13</i>  | rs1709082        | 19       | 41,601,609        | G            | 0.07        | 0.30         | 0.01         | 0.60         | 0.046          |
| <i>CYP2D6</i>   | rs28360521       | 22       | 42,528,976        | A            | 0.24        | -0.12        | -0.23        | 0.00         | 0.048          |

MTX, methotrexate; SNP, single nucleotide polymorphism; Chr, chromosome; MAF, minor allele frequency; 95% CI, 95% confidence interval; P, p-value; del, deletion.

Covariate included in statistical model is creatinine plasma levels at week 1.

Effect sizes and 95% CI are reported for the minor allele.

A coefficient below 0 indicates that carriers of minor allele have lower MTX plasma levels compared to carriers of the major allele.

The variant depicted in bold surpasses the Bonferroni corrected p-value threshold of  $9.2 \times 10^{-5}$ .

The following variants are in linkage disequilibrium ( $r^2 > 0.80$ ): rs3755163 and rs4148771 (*ABCB11*), all depicted variants within *CHST10*, *CYP1B1*, *SLC22A14*, *PPARD* and *CYP2D6*.

**Table S3. Genetic variants associated with creatinine plasma levels, 48 hours after MTX infusion (P<0.05)**

| Gene            | SNP        | Chr | Position    | Minor allele | MAF  | Coefficient | 95% CI |       | P     |
|-----------------|------------|-----|-------------|--------------|------|-------------|--------|-------|-------|
| <i>ABCC1</i>    | rs246221   | 16  | 16,138,322  | C            | 0.25 | -4.86       | -7.82  | -1.89 | 0.001 |
| <i>VKORC1</i>   | rs7294     | 16  | 31,102,321  | A            | 0.33 | -4.51       | -7.30  | -1.73 | 0.001 |
| <i>GSTA1</i>    | rs4715332  | 6   | 52,669,185  | G            | 0.42 | 5.68        | 2.13   | 9.24  | 0.002 |
| <i>ABCB4</i>    | rs2230028  | 7   | 87,056,176  | G            | 0.11 | -5.40       | -9.16  | -1.65 | 0.005 |
| <i>CYP3A43</i>  | rs17342647 | 7   | 99,459,256  | T            | 0.08 | 7.62        | 2.32   | 12.92 | 0.005 |
| <i>CROT</i>     | rs7785206  | 7   | 87,021,023  | C            | 0.10 | -5.89       | -10.01 | -1.78 | 0.005 |
| <i>SLCO3A1</i>  | rs3743369  | 15  | 92,707,569  | G            | 0.42 | -4.51       | -7.69  | -1.32 | 0.006 |
| <i>SLC22A7</i>  | rs2242416  | 6   | 43,273,604  | A            | 0.43 | 4.90        | 1.37   | 8.44  | 0.007 |
| <i>GSTA5</i>    | rs4715354  | 6   | 52,708,797  | T            | 0.47 | -3.87       | -6.70  | -1.04 | 0.007 |
| <i>CDA</i>      | rs1048977  | 1   | 20,945,055  | T            | 0.34 | 3.62        | 0.90   | 6.34  | 0.009 |
| <i>ADH1A</i>    | rs12512110 | 4   | 100,195,815 | A            | 0.08 | 6.22        | 1.53   | 10.90 | 0.009 |
| <i>VKORC1</i>   | rs9923231  | 16  | 31,107,689  | A            | 0.47 | 4.27        | 1.05   | 7.50  | 0.009 |
| <i>VKORC1</i>   | rs8050894  | 16  | 31,104,509  | C            | 0.48 | 4.12        | 1.01   | 7.23  | 0.009 |
| <i>VKORC1</i>   | rs9934438  | 16  | 31,104,878  | T            | 0.47 | 4.18        | 1.02   | 7.35  | 0.010 |
| <i>ABCB11</i>   | rs2287622  | 2   | 169,830,328 | T            | 0.41 | 4.90        | 1.05   | 8.76  | 0.013 |
| <i>SLC15A1</i>  | rs2297322  | 13  | 99,376,181  | A            | 0.15 | 5.71        | 1.18   | 10.25 | 0.014 |
| <i>POR</i>      | rs17685*   | 7   | 75,616,105  | A            | 0.29 | -4.23       | -7.59  | -0.87 | 0.014 |
| <i>ABCC5</i>    | rs3749442  | 3   | 183,660,585 | T            | 0.18 | -5.12       | -9.29  | -0.94 | 0.016 |
| <i>ABCB11</i>   | rs4148768* | 2   | 169,887,154 | T            | 0.09 | 8.39        | 1.50   | 15.28 | 0.017 |
| <i>SLC16A1</i>  | rs9429505  | 1   | 113,454,571 | C            | 0.24 | 4.72        | 0.83   | 8.61  | 0.017 |
| <i>ABCB1</i>    | rs9282564  | 7   | 87,229,440  | G            | 0.10 | -6.21       | -11.33 | -1.08 | 0.018 |
| <i>VKORC1</i>   | rs2884737  | 16  | 31,105,554  | G            | 0.30 | 3.85        | 0.61   | 7.10  | 0.020 |
| <i>MAT1A</i>    | rs9285726  | 10  | 82,035,150  | T            | 0.35 | 3.81        | 0.56   | 7.05  | 0.021 |
| <i>GSTP1</i>    | rs1138272* | 11  | 67,353,579  | T            | 0.11 | 6.77        | 1.00   | 12.54 | 0.021 |
| <i>NQO1</i>     | rs10517    | 16  | 69,743,760  | T            | 0.13 | -4.91       | -9.12  | -0.70 | 0.022 |
| <i>ABCB11</i>   | rs3770603  | 2   | 169,883,218 | A            | 0.09 | 8.09        | 1.14   | 15.03 | 0.023 |
| <i>XDH</i>      | rs2295475  | 2   | 31,589,847  | T            | 0.32 | 4.60        | 0.55   | 8.65  | 0.026 |
| <i>SLC6A6</i>   | rs9036     | 3   | 14,530,721  | G            | 0.26 | 3.71        | 0.44   | 6.99  | 0.026 |
| <i>ADH7</i>     | rs1573496  | 4   | 100,349,669 | C            | 0.11 | -4.57       | -8.73  | -0.41 | 0.031 |
| <i>CYP4F8</i>   | rs4646523  | 19  | 15,726,487  | G            | 0.38 | 3.10        | 0.27   | 5.93  | 0.032 |
| <i>SLC22A12</i> | rs11231825 | 11  | 64,360,274  | T            | 0.34 | -4.12       | -7.91  | -0.33 | 0.033 |
| <i>FMO3</i>     | rs2066534  | 1   | 171,077,372 | G            | 0.16 | -4.05       | -7.84  | -0.26 | 0.036 |
| <i>ADH7</i>     | rs971074   | 4   | 100,341,861 | A            | 0.12 | -4.28       | -8.30  | -0.26 | 0.037 |
| <i>CYP1B1</i>   | rs1800440  | 2   | 38,298,139  | G            | 0.14 | -5.25       | -10.29 | -0.20 | 0.042 |
| <i>FMO2</i>     | rs2307492  | 1   | 171,168,545 | C            | 0.07 | -3.63       | -7.16  | -0.09 | 0.044 |
| <i>SPN</i>      | rs4788172  | 16  | 29,668,253  | A            | 0.06 | -5.08       | -10.07 | -0.09 | 0.046 |
| <i>POR</i>      | rs6965343  | 7   | 75,592,925  | T            | 0.38 | -3.21       | -6.36  | -0.05 | 0.046 |

MTX, methotrexate; SNP, single nucleotide polymorphism; Chr, chromosome; MAF, minor allele frequency; 95% CI, 95% confidence interval; P, p-value.

Covariate included in statistical model is age.

Effect sizes and 95% CI are reported for the minor allele.

A coefficient below 0 indicates that carriers of minor allele have lower creatinine plasma levels compared to carriers of the major allele.

The following variants are in linkage disequilibrium ( $r^2 > 0.80$ ): rs2230028 (*ABCB4*) and rs7785206 (*CROT*), rs4715332 (*GSTAI1*) and rs4715354 (*GSTA5*), all depicted variants within *ABCB11*, *ADH7* and *VKORC1* (except rs7294 and rs2884737).

\* variant is also associated with MTX plasma levels at 48 hours ( $P < 0.05$ , Table S2).

**Table S4. Genetic variants associated with creatinine plasma levels, 1 week after MTX infusion (P<0.05)**

| Gene            | SNP        | Chr | Position    | Minor allele | MAF  | Coefficient | 95% CI |       | P      |
|-----------------|------------|-----|-------------|--------------|------|-------------|--------|-------|--------|
| <i>CYP1B1</i>   | rs1800440  | 2   | 38,298,139  | G            | 0.14 | -8.66       | -13.07 | -4.26 | 0.0001 |
| <i>CYP3A43</i>  | rs17342647 | 7   | 99,459,256  | T            | 0.08 | 8.06        | 3.52   | 12.59 | 0.0005 |
| <i>SLC22A3</i>  | rs668871   | 6   | 160,769,811 | T            | 0.47 | -5.03       | -8.56  | -1.51 | 0.005  |
| <i>SLCO3A1</i>  | rs3743369  | 15  | 92,707,569  | G            | 0.42 | -4.40       | -7.57  | -1.23 | 0.006  |
| <i>SLC13A1</i>  | rs1880179  | 7   | 122,838,633 | A            | 0.41 | -3.44       | -6.03  | -0.86 | 0.009  |
| <i>SLC22A2</i>  | rs624249*  | 6   | 160,679,400 | T            | 0.42 | -4.24       | -7.48  | -0.99 | 0.011  |
| <i>SLCO5A1</i>  | rs16936279 | 8   | 70,584,809  | C            | 0.12 | -5.38       | -9.61  | -1.14 | 0.013  |
| <i>SLCO3A1</i>  | rs1517618  | 15  | 92,647,645  | G            | 0.17 | -5.12       | -9.17  | -1.06 | 0.013  |
| <i>CDA</i>      | rs2072671  | 1   | 20,915,701  | C            | 0.33 | -4.47       | -8.03  | -0.91 | 0.014  |
| <i>SLC13A1</i>  | rs2204295  | 7   | 122,838,090 | G            | 0.40 | -3.22       | -5.81  | -0.63 | 0.015  |
| <i>ATP7B</i>    | rs2277448  | 13  | 52,585,548  | C            | 0.37 | -4.30       | -7.84  | -0.77 | 0.017  |
| <i>SLC22A11</i> | rs2078267  | 11  | 64,334,114  | C            | 0.47 | -4.30       | -7.93  | -0.68 | 0.020  |
| <i>CYP39A1</i>  | rs2277119  | 6   | 46,609,905  | A            | 0.25 | 4.89        | 0.63   | 9.14  | 0.024  |
| <i>FMO2</i>     | rs2307492  | 1   | 171,168,545 | C            | 0.07 | -4.93       | -9.24  | -0.62 | 0.025  |
| <i>ATP7B</i>    | rs1051332  | 13  | 52,507,720  | A            | 0.46 | 4.27        | 0.50   | 8.03  | 0.026  |
| <i>UGT2B7</i>   | rs7668258  | 4   | 69,962,078  | C            | 0.42 | 3.52        | 0.39   | 6.65  | 0.028  |
| <i>UGT2B7</i>   | rs7662029  | 4   | 69,961,912  | G            | 0.42 | 3.52        | 0.39   | 6.65  | 0.028  |
| <i>UGT2B7</i>   | rs7439366  | 4   | 69,964,338  | C            | 0.42 | 3.48        | 0.35   | 6.61  | 0.029  |
| <i>UGT2B7</i>   | rs7438284  | 4   | 69,964,337  | T            | 0.42 | 3.48        | 0.35   | 6.61  | 0.029  |
| <i>GSTP1</i>    | rs1138272* | 11  | 67,353,579  | T            | 0.11 | 6.15        | 0.58   | 11.71 | 0.030  |
| <i>VKORC1</i>   | rs7294     | 16  | 31,102,321  | A            | 0.33 | -3.34       | -6.46  | -0.22 | 0.036  |
| <i>CYP4A11</i>  | rs11211402 | 1   | 47,392,054  | G            | 0.16 | -4.20       | -8.17  | -0.23 | 0.038  |
| <i>VKORC1</i>   | rs2884737  | 16  | 31,105,554  | G            | 0.30 | 3.57        | 0.19   | 6.95  | 0.039  |
| <i>SLC22A12</i> | rs11231825 | 11  | 64,360,274  | T            | 0.34 | -3.77       | -7.35  | -0.19 | 0.039  |
| <i>VKORC1</i>   | rs8050894  | 16  | 31,104,509  | C            | 0.48 | 3.40        | 0.17   | 6.62  | 0.039  |
| <i>CYP2A6</i>   | rs28399433 | 19  | 41,356,379  | G            | 0.07 | 6.52        | 0.33   | 12.70 | 0.039  |
| <i>CROT</i>     | rs31652    | 7   | 87,029,687  | G            | 0.15 | -4.31       | -8.49  | -0.13 | 0.043  |
| <i>VKORC1</i>   | rs9934438  | 16  | 31,104,878  | T            | 0.47 | 3.36        | 0.10   | 6.61  | 0.043  |
| <i>CYP4F12</i>  | rs609290   | 19  | 15,789,140  | A            | 0.07 | 5.73        | 0.13   | 11.33 | 0.045  |
| <i>CYP4F12</i>  | rs609636   | 19  | 15,789,098  | A            | 0.07 | 5.73        | 0.13   | 11.33 | 0.045  |
| <i>ABCC4</i>    | rs4148551  | 13  | 95,673,518  | G            | 0.42 | -3.42       | -6.79  | -0.05 | 0.047  |
| <i>ABCC4</i>    | rs3742106  | 13  | 95,673,791  | G            | 0.42 | -3.48       | -6.93  | -0.04 | 0.047  |
| <i>ABCC1</i>    | rs8187858  | 16  | 16,162,039  | T            | 0.09 | -4.68       | -9.32  | -0.03 | 0.048  |

MTX, methotrexate; SNP, single nucleotide polymorphism; Chr, chromosome; MAF, minor allele frequency; 95% CI, 95% confidence interval; P, p-value.

Covariates included in statistical model are age and MTX cumulative dose.

Effect sizes and 95% CI are reported for the minor allele.

A coefficient below 0 indicates that carriers of minor allele have lower creatinine plasma levels compared to carriers of the major allele.

The following variants are in linkage disequilibrium ( $r^2 > 0.80$ ): all depicted variants within *ABCC4*, *CYP4F12*, *SLC3A1*, *UGT2B7* and *VKORC1* (except rs7294 and rs2884737).

\* variant is also associated with MTX plasma levels at 48 hours (P<0.05, Table S2).

**Table S5. Genetic variants associated with ALAT, 1 week after MTX infusion (P<0.05)**

| Gene           | SNP        | Chr | Position    | Minor allele | MAF  | Linear multivariate GEE analysis with ALAT levels |        |       |        | Logistic multivariate GEE analysis of CTCAE v5 ALAT increase, grade 0-1 compared to grade 2-4 |        |       |        |
|----------------|------------|-----|-------------|--------------|------|---------------------------------------------------|--------|-------|--------|-----------------------------------------------------------------------------------------------|--------|-------|--------|
|                |            |     |             |              |      | Coefficient                                       | 95% CI |       | P      | Coefficient                                                                                   | 95% CI |       | P      |
| <i>CYP4F2</i>  | rs3093153  | 19  | 16,001,215  | T            | 0.05 | 0.67                                              | 0.32   | 1.03  | 0.0002 | 2.32                                                                                          | 0.91   | 3.73  | 0.001  |
| <i>PPARD</i>   | rs6906237  | 6   | 35,375,526  | A            | 0.05 | 0.78                                              | 0.34   | 1.22  | 0.0005 | 1.24                                                                                          | 0.12   | 2.37  | 0.030  |
| <i>CYP2E1</i>  | rs2070673  | 10  | 135,340,567 | A            | 0.15 | -0.44                                             | -0.71  | -0.18 | 0.001  | -0.91                                                                                         | -1.67  | -0.14 | 0.020  |
| <i>CYP2E1</i>  | rs2515641  | 10  | 135,351,362 | T            | 0.09 | -0.65                                             | -1.04  | -0.25 | 0.001  | -1.43                                                                                         | -2.50  | -0.35 | 0.009  |
| <i>PTGIS</i>   | rs5629     | 20  | 48,129,706  | A            | 0.24 | -0.38                                             | -0.62  | -0.15 | 0.002  | -0.67                                                                                         | -1.19  | -0.14 | 0.012  |
| <i>NATI</i>    | rs4986993  | 8   | 18,080,747  | T            | 0.27 | -0.38                                             | -0.61  | -0.14 | 0.002  | -0.66                                                                                         | -1.18  | -0.13 | 0.015  |
| <i>CYP2A6</i>  | rs1137115  | 19  | 41,356,281  | A            | 0.33 | -0.30                                             | -0.50  | -0.10 | 0.004  | -0.67                                                                                         | -1.17  | -0.16 | 0.009  |
| <i>PPARD</i>   | rs6457816  | 6   | 35,362,848  | C            | 0.07 | 0.64                                              | 0.19   | 1.08  | 0.005  | 1.00                                                                                          | -0.01  | 2.01  | 0.053  |
| <i>PPARD</i>   | rs6922548* | 6   | 35,353,523  | G            | 0.06 | 0.68                                              | 0.20   | 1.15  | 0.005  | 1.09                                                                                          | -0.02  | 2.20  | 0.055  |
| <i>PPARD</i>   | rs7739752* | 6   | 35,339,035  | T            | 0.06 | 0.68                                              | 0.20   | 1.15  | 0.005  | 1.09                                                                                          | -0.02  | 2.20  | 0.055  |
| <i>CYP1B1</i>  | rs1056836* | 2   | 38,298,203  | G            | 0.42 | -0.29                                             | -0.50  | -0.08 | 0.006  | -0.43                                                                                         | -0.95  | 0.08  | 0.101  |
| <i>SLCO1B1</i> | rs11045819 | 12  | 21,329,813  | A            | 0.25 | 0.34                                              | 0.09   | 0.59  | 0.007  | 0.58                                                                                          | -0.16  | 1.32  | 0.125  |
| <i>SLCO1B1</i> | rs4149056  | 12  | 21,331,549  | C            | 0.16 | -0.43                                             | -0.75  | -0.12 | 0.007  | -0.75                                                                                         | -1.56  | 0.05  | 0.067  |
| <i>CBR1</i>    | rs2835265  | 21  | 37,444,696  | T            | 0.10 | 0.51                                              | 0.14   | 0.89  | 0.007  | 1.25                                                                                          | 0.11   | 2.38  | 0.032  |
| <i>CYP1B1</i>  | rs1056837* | 2   | 38,298,150  | T            | 0.42 | -0.28                                             | -0.49  | -0.07 | 0.009  | -0.43                                                                                         | -0.94  | 0.09  | 0.106  |
| <i>CYP2D6</i>  | rs3892097  | 22  | 42,524,947  | A            | 0.22 | 0.31                                              | 0.08   | 0.54  | 0.009  | 1.23                                                                                          | 0.57   | 1.90  | 0.0003 |
| <i>SLC7A7</i>  | rs1805059  | 14  | 23,282,449  | G            | 0.35 | -0.29                                             | -0.50  | -0.07 | 0.010  | -0.66                                                                                         | -1.09  | -0.23 | 0.003  |
| <i>ABCC4</i>   | rs2274406  | 13  | 95,858,996  | A            | 0.27 | -0.37                                             | -0.66  | -0.09 | 0.010  | -0.80                                                                                         | -1.46  | -0.14 | 0.018  |
| <i>ABCC4</i>   | rs2274405  | 13  | 95,858,978  | A            | 0.26 | -0.37                                             | -0.66  | -0.09 | 0.010  | -0.80                                                                                         | -1.46  | -0.14 | 0.018  |
| <i>CYP2B6</i>  | rs2279343  | 19  | 41,515,263  | G            | 0.30 | -0.29                                             | -0.51  | -0.07 | 0.011  | -0.30                                                                                         | -0.81  | 0.20  | 0.243  |
| <i>GSTP1</i>   | rs1138272* | 11  | 67,353,579  | T            | 0.11 | 0.42                                              | 0.09   | 0.75  | 0.014  | 0.82                                                                                          | -0.08  | 1.72  | 0.074  |
| <i>SLC28A1</i> | rs2305367  | 15  | 85,476,441  | A            | 0.41 | 0.34                                              | 0.06   | 0.62  | 0.017  | 0.66                                                                                          | 0.13   | 1.19  | 0.014  |
| <i>ABCB4</i>   | rs1202283  | 7   | 87,082,292  | T            | 0.50 | 0.27                                              | 0.04   | 0.49  | 0.019  | 0.41                                                                                          | -0.16  | 0.98  | 0.160  |
| <i>CYP2A6</i>  | rs8192729  | 19  | 41,350,996  | A            | 0.08 | 0.43                                              | 0.07   | 0.79  | 0.019  | 1.75                                                                                          | 0.66   | 2.84  | 0.002  |
| <i>PPARD</i>   | rs6901410* | 6   | 35,330,030  | C            | 0.06 | 0.62                                              | 0.10   | 1.15  | 0.020  | 1.02                                                                                          | -0.10  | 2.15  | 0.075  |
| <i>ALDH2</i>   | rs886205   | 12  | 112,204,427 | G            | 0.21 | -0.34                                             | -0.63  | -0.05 | 0.021  | -0.45                                                                                         | -1.07  | 0.16  | 0.146  |
| <i>SULT1C4</i> | rs1402467  | 2   | 108,994,808 | G            | 0.24 | -0.30                                             | -0.56  | -0.04 | 0.024  | -0.45                                                                                         | -1.04  | 0.13  | 0.131  |



|                |            |    |             |   |      |       |       |       |       |       |       |       |       |
|----------------|------------|----|-------------|---|------|-------|-------|-------|-------|-------|-------|-------|-------|
| <i>ABPI</i>    | rs10893    | 7  | 150,555,915 | G | 0.34 | 0.24  | 0.03  | 0.46  | 0.025 | 0.63  | 0.07  | 1.19  | 0.027 |
| <i>CYP7A1</i>  | rs8192879  | 8  | 59,403,576  | A | 0.42 | -0.32 | -0.61 | -0.04 | 0.026 | -0.47 | -1.15 | 0.21  | 0.172 |
| <i>ABCC4</i>   | rs1059751  | 13 | 95,672,950  | C | 0.45 | 0.22  | 0.03  | 0.41  | 0.027 | 0.43  | -0.08 | 0.94  | 0.100 |
| <i>ABCC4</i>   | rs4148553  | 13 | 95,673,135  | A | 0.45 | 0.22  | 0.02  | 0.41  | 0.029 | 0.42  | -0.08 | 0.93  | 0.100 |
| <i>SLCO1B1</i> | rs4149057  | 12 | 21,331,599  | T | 0.39 | -0.26 | -0.50 | -0.02 | 0.034 | -0.41 | -0.96 | 0.15  | 0.152 |
| <i>SLC6A6</i>  | rs9036     | 3  | 14,530,721  | G | 0.26 | 0.22  | 0.01  | 0.42  | 0.035 | 0.62  | 0.06  | 1.18  | 0.029 |
| <i>SLCO5A1</i> | rs1138541  | 8  | 70,584,628  | A | 0.26 | 0.27  | 0.02  | 0.52  | 0.036 | 0.34  | -0.25 | 0.93  | 0.256 |
| <i>CHST2</i>   | rs3755739  | 3  | 142,837,272 | A | 0.24 | -0.28 | -0.54 | -0.02 | 0.036 | -0.77 | -1.37 | -0.17 | 0.012 |
| <i>CYP7A1</i>  | rs13251066 | 8  | 59,417,753  | C | 0.44 | -0.30 | -0.58 | -0.01 | 0.039 | -0.48 | -1.14 | 0.17  | 0.147 |
| <i>NR1I2</i>   | rs3814055  | 3  | 119,500,035 | T | 0.35 | -0.22 | -0.43 | -0.01 | 0.042 | -0.26 | -0.76 | 0.24  | 0.304 |
| <i>SLC22A4</i> | rs1050152  | 5  | 131,676,320 | T | 0.42 | 0.23  | 0.01  | 0.45  | 0.042 | 0.66  | 0.19  | 1.14  | 0.006 |
| <i>ABPI</i>    | rs1049793  | 7  | 150,557,665 | G | 0.34 | 0.22  | 0.01  | 0.44  | 0.043 | 0.54  | -0.01 | 1.09  | 0.052 |
| <i>ABPI</i>    | rs12179    | 7  | 150,557,622 | A | 0.34 | 0.22  | 0.01  | 0.44  | 0.043 | 0.54  | -0.01 | 1.09  | 0.052 |
| <i>PON3</i>    | rs13226149 | 7  | 95,025,600  | T | 0.30 | 0.23  | 0.01  | 0.45  | 0.044 | 0.59  | -0.04 | 1.21  | 0.066 |
| <i>ABCC4</i>   | rs4148551  | 13 | 95,673,518  | G | 0.42 | -0.23 | -0.45 | 0.00  | 0.046 | -0.44 | -0.98 | 0.10  | 0.111 |
| <i>SLC28A3</i> | rs7853758  | 9  | 86,900,926  | T | 0.10 | -0.49 | -0.97 | -0.01 | 0.046 | -1.11 | -1.97 | -0.25 | 0.011 |
| <i>HMGCR</i>   | rs5909     | 5  | 74,656,175  | A | 0.08 | 0.46  | 0.01  | 0.92  | 0.047 | 0.67  | -0.44 | 1.77  | 0.239 |
| <i>SLC7A7</i>  | rs1061040  | 14 | 23,242,828  | A | 0.10 | -0.53 | -1.05 | -0.01 | 0.047 | -0.91 | -1.89 | 0.08  | 0.070 |
| <i>GSTM2</i>   | rs592792   | 1  | 110,211,956 | T | 0.19 | 0.35  | 0.00  | 0.69  | 0.047 | 0.76  | -0.04 | 1.55  | 0.063 |
| <i>POR</i>     | rs17685*   | 7  | 75,616,105  | A | 0.29 | -0.27 | -0.54 | 0.00  | 0.049 | -1.01 | -1.71 | -0.32 | 0.004 |
| <i>XDH</i>     | rs2295475  | 2  | 31,589,847  | T | 0.32 | 0.27  | 0.00  | 0.54  | 0.049 | 0.57  | -0.11 | 1.25  | 0.101 |
| <i>ABCB4</i>   | rs2097937* | 7  | 87,030,903  | C | 0.24 | -0.28 | -0.56 | 0.00  | 0.049 | -0.44 | -1.03 | 0.14  | 0.138 |

ALAT, alanine aminotransferase; MTX, methotrexate; SNP, single nucleotide polymorphism; Chr, chromosome; MAF, minor allele frequency; 95% CI, 95% confidence interval; P, p-value.

Covariates included in the linear and in the logistic GEE models are age and creatinine plasma levels at week 1.

Effect sizes and 95% CI are reported for the minor allele.

A coefficient below 0 indicates that carriers of minor allele have lower ALAT levels compared to carriers of the major allele.

The following variants are in linkage disequilibrium ( $r^2 > 0.80$ ): rs2274406 and rs2274405 (*ABCC4*), rs1059751 and rs4148553 (*ABCC4*), all depicted variants within *ABPI*, *CYP1B1*, *CYP7A1*, *PPARD* (except rs6906237, which is linkage disequilibrium with rs7739752).

\* variant is also associated with MTX plasma levels at 48 hours ( $P < 0.05$ , Table S2).

**Table S6: Genetic variants associated with ASAT, 1 week after MTX infusion (P<0.05)**

| Gene           | SNP        | Chr | Position    | Minor allele | MAF  | Linear multivariate GEE analysis with ASAT levels |        |       |        | Logistic multivariate GEE analysis of CTCAE v5 ASAT increase, grade 0-1 compared to grade 2-4 |        |       |        |
|----------------|------------|-----|-------------|--------------|------|---------------------------------------------------|--------|-------|--------|-----------------------------------------------------------------------------------------------|--------|-------|--------|
|                |            |     |             |              |      | Coefficient                                       | 95% CI |       | P      | Coefficient                                                                                   | 95% CI |       | P      |
| <i>ALDH2</i>   | rs886205   | 12  | 112,204,427 | G            | 0.21 | -0.43                                             | -0.67  | -0.20 | 0.0003 | -0.53                                                                                         | -1.09  | 0.03  | 0.062  |
| <i>PTGIS</i>   | rs5629     | 20  | 48,129,706  | A            | 0.24 | -0.38                                             | -0.60  | -0.17 | 0.0004 | -0.72                                                                                         | -1.20  | -0.24 | 0.003  |
| <i>CYP4B1</i>  | rs2297810  | 1   | 47,280,859  | A            | 0.11 | -0.45                                             | -0.70  | -0.20 | 0.0005 | -0.97                                                                                         | -1.68  | -0.26 | 0.008  |
| <i>CYP2E1</i>  | rs2070673  | 10  | 135,340,567 | A            | 0.15 | -0.39                                             | -0.63  | -0.15 | 0.001  | -1.01                                                                                         | -1.69  | -0.33 | 0.004  |
| <i>CYP2A6</i>  | rs1137115  | 19  | 41,356,281  | A            | 0.33 | -0.26                                             | -0.43  | -0.09 | 0.002  | -0.44                                                                                         | -0.88  | 0.00  | 0.050  |
| <i>CYP2B6</i>  | rs2279343  | 19  | 41,515,263  | G            | 0.30 | -0.30                                             | -0.50  | -0.10 | 0.003  | -0.43                                                                                         | -0.87  | 0.02  | 0.059  |
| <i>GSTP1</i>   | rs1138272  | 11  | 67,353,579  | T            | 0.11 | 0.44                                              | 0.14   | 0.75  | 0.004  | 0.81                                                                                          | 0.12   | 1.49  | 0.021  |
| <i>FMO3</i>    | rs1800822  | 1   | 171,076,935 | T            | 0.05 | -0.54                                             | -0.92  | -0.15 | 0.006  | -1.10                                                                                         | -2.02  | -0.18 | 0.019  |
| <i>CYP1A2</i>  | rs35694136 | 15  | 75,039,613  | delT         | 0.10 | -0.32                                             | -0.55  | -0.09 | 0.006  | -0.80                                                                                         | -1.41  | -0.19 | 0.010  |
| <i>CYP4B1</i>  | rs4646491  | 1   | 47,280,884  | T            | 0.10 | -0.43                                             | -0.75  | -0.12 | 0.007  | -0.93                                                                                         | -1.73  | -0.14 | 0.021  |
| <i>CYP4B1</i>  | rs3215983  | 1   | 47,280,747  | delAT        | 0.10 | -0.43                                             | -0.75  | -0.12 | 0.007  | -0.93                                                                                         | -1.73  | -0.14 | 0.021  |
| <i>GSTM2</i>   | rs530021   | 1   | 110,210,780 | C            | 0.06 | -0.53                                             | -0.92  | -0.14 | 0.008  | -1.33                                                                                         | -2.55  | -0.11 | 0.033  |
| <i>CA5P</i>    | rs1364182  | 16  | 29,656,093  | T            | 0.07 | -0.49                                             | -0.86  | -0.12 | 0.009  | -1.71                                                                                         | -3.09  | -0.34 | 0.014  |
| <i>UGT2B15</i> | rs3100     | 4   | 69,512,655  | C            | 0.32 | -0.22                                             | -0.39  | -0.06 | 0.009  | -0.51                                                                                         | -0.87  | -0.14 | 0.007  |
| <i>UGT1A7</i>  | rs7586110  | 2   | 234,590,527 | G            | 0.35 | 0.25                                              | 0.06   | 0.45  | 0.010  | 0.65                                                                                          | 0.27   | 1.04  | 0.001  |
| <i>NAT1</i>    | rs4986993  | 8   | 18,080,747  | T            | 0.27 | -0.30                                             | -0.53  | -0.07 | 0.011  | -0.72                                                                                         | -1.21  | -0.23 | 0.004  |
| <i>ABCC4</i>   | rs4148551  | 13  | 95,673,518  | G            | 0.42 | -0.21                                             | -0.39  | -0.04 | 0.014  | -0.43                                                                                         | -0.81  | -0.04 | 0.030  |
| <i>ABCB11</i>  | rs4148768  | 2   | 169,887,154 | T            | 0.09 | 0.37                                              | 0.07   | 0.68  | 0.015  | 0.83                                                                                          | 0.10   | 1.57  | 0.026  |
| <i>CYP4F11</i> | rs2305801  | 19  | 16,045,141  | A            | 0.20 | 0.24                                              | 0.04   | 0.44  | 0.017  | 0.31                                                                                          | -0.12  | 0.74  | 0.152  |
| <i>SLCO4A1</i> | rs3787537  | 20  | 61,303,742  | T            | 0.24 | 0.30                                              | 0.05   | 0.55  | 0.020  | 0.95                                                                                          | 0.42   | 1.47  | 0.0004 |
| <i>CYP1B1</i>  | rs1056836  | 2   | 38,298,203  | G            | 0.42 | -0.23                                             | -0.43  | -0.04 | 0.021  | -0.45                                                                                         | -0.86  | -0.03 | 0.034  |
| <i>ABP1</i>    | rs10893    | 7   | 150,555,915 | G            | 0.34 | 0.22                                              | 0.03   | 0.40  | 0.021  | 0.52                                                                                          | 0.11   | 0.93  | 0.014  |
| <i>SLC22A4</i> | rs1050152  | 5   | 131,676,320 | T            | 0.42 | 0.22                                              | 0.03   | 0.41  | 0.021  | 0.58                                                                                          | 0.17   | 0.99  | 0.005  |
| <i>RALBP1</i>  | rs10898    | 18  | 9,536,249   | C            | 0.31 | -0.26                                             | -0.48  | -0.04 | 0.022  | -0.49                                                                                         | -0.98  | -0.01 | 0.045  |
| <i>CYP2A6</i>  | rs4803381  | 19  | 41,357,344  | A            | 0.40 | -0.20                                             | -0.37  | -0.03 | 0.023  | -0.34                                                                                         | -0.75  | 0.07  | 0.107  |
| <i>UGT2B7</i>  | rs7439366  | 4   | 69,964,338  | C            | 0.42 | -0.24                                             | -0.45  | -0.03 | 0.023  | -0.49                                                                                         | -0.97  | 0.00  | 0.048  |
| <i>UGT2B7</i>  | rs7438284  | 4   | 69,964,337  | T            | 0.42 | -0.24                                             | -0.45  | -0.03 | 0.023  | -0.49                                                                                         | -0.97  | 0.00  | 0.048  |
| <i>UGT2B7</i>  | rs7668258  | 4   | 69,962,078  | C            | 0.42 | -0.24                                             | -0.45  | -0.03 | 0.023  | -0.49                                                                                         | -0.97  | 0.00  | 0.048  |

|                |            |    |             |   |      |       |       |       |       |       |       |       |       |
|----------------|------------|----|-------------|---|------|-------|-------|-------|-------|-------|-------|-------|-------|
| <i>UGT2B7</i>  | rs7662029  | 4  | 69,961,912  | G | 0.42 | -0.24 | -0.45 | -0.03 | 0.023 | -0.49 | -0.97 | 0.00  | 0.048 |
| <i>ABCC4</i>   | rs3742106  | 13 | 95,673,791  | G | 0.42 | -0.20 | -0.37 | -0.03 | 0.025 | -0.42 | -0.80 | -0.03 | 0.033 |
| <i>ABCB4</i>   | rs2230028  | 7  | 87,056,176  | G | 0.11 | -0.42 | -0.78 | -0.05 | 0.025 | -0.33 | -1.08 | 0.41  | 0.383 |
| <i>SLC16A1</i> | rs9429505  | 1  | 113,454,571 | C | 0.24 | 0.27  | 0.03  | 0.51  | 0.027 | 0.50  | 0.04  | 0.97  | 0.034 |
| <i>CYP1B1</i>  | rs1056837  | 2  | 38,298,150  | T | 0.42 | -0.22 | -0.42 | -0.02 | 0.028 | -0.44 | -0.85 | -0.02 | 0.040 |
| <i>SLC22A3</i> | rs2292334  | 6  | 160,858,188 | A | 0.39 | -0.24 | -0.46 | -0.03 | 0.028 | -0.52 | -1.02 | -0.03 | 0.039 |
| <i>SLC10A1</i> | rs4646285  | 14 | 70,263,648  | A | 0.09 | -0.26 | -0.50 | -0.03 | 0.029 | -0.43 | -0.95 | 0.09  | 0.107 |
| <i>CYP2E1</i>  | rs2515641  | 10 | 135,351,362 | T | 0.09 | -0.42 | -0.81 | -0.03 | 0.033 | -0.92 | -1.89 | 0.05  | 0.064 |
| <i>CROT</i>    | rs7785206  | 7  | 87,021,023  | C | 0.10 | -0.43 | -0.83 | -0.03 | 0.033 | -0.39 | -1.21 | 0.42  | 0.341 |
| <i>CYP2B6</i>  | rs3745274  | 19 | 41,512,841  | T | 0.26 | -0.24 | -0.46 | -0.02 | 0.033 | -0.29 | -0.75 | 0.17  | 0.215 |
| <i>SLCO1B1</i> | rs11045819 | 12 | 21,329,813  | A | 0.25 | 0.24  | 0.02  | 0.45  | 0.035 | 0.29  | -0.21 | 0.79  | 0.252 |
| <i>ABP1</i>    | rs1049793  | 7  | 150,557,665 | G | 0.34 | 0.20  | 0.01  | 0.38  | 0.037 | 0.47  | 0.06  | 0.88  | 0.023 |
| <i>ABP1</i>    | rs12179    | 7  | 150,557,622 | A | 0.34 | 0.20  | 0.01  | 0.38  | 0.037 | 0.47  | 0.06  | 0.88  | 0.023 |
| <i>CYP24A1</i> | rs2762934  | 20 | 52,771,261  | T | 0.15 | -0.21 | -0.41 | -0.01 | 0.039 | -0.47 | -0.95 | 0.00  | 0.052 |
| <i>CYP4F11</i> | rs1060463  | 19 | 16,025,176  | G | 0.42 | 0.22  | 0.01  | 0.43  | 0.039 | 0.29  | -0.13 | 0.71  | 0.174 |
| <i>PON3</i>    | rs13226149 | 7  | 95,025,600  | T | 0.30 | 0.22  | 0.01  | 0.43  | 0.039 | 0.55  | 0.10  | 1.00  | 0.018 |
| <i>GSTM2</i>   | rs592792   | 1  | 110,211,956 | T | 0.19 | 0.29  | 0.01  | 0.58  | 0.040 | 0.87  | 0.26  | 1.48  | 0.005 |
| <i>UGT2B15</i> | rs4148269  | 4  | 69,512,847  | A | 0.33 | -0.18 | -0.36 | -0.01 | 0.040 | -0.33 | -0.69 | 0.02  | 0.068 |
| <i>ABCC4</i>   | rs1059751  | 13 | 95,672,950  | C | 0.45 | 0.18  | 0.00  | 0.35  | 0.044 | 0.45  | 0.07  | 0.83  | 0.021 |
| <i>ABCC4</i>   | rs4148553  | 13 | 95,673,135  | A | 0.45 | 0.17  | 0.00  | 0.34  | 0.047 | 0.44  | 0.06  | 0.82  | 0.023 |
| <i>ABCB4</i>   | rs2097937  | 7  | 87,030,903  | C | 0.24 | -0.25 | -0.49 | 0.00  | 0.048 | -0.02 | -0.49 | 0.44  | 0.922 |
| <i>UGT1A1</i>  | rs3755319  | 2  | 234,667,582 | C | 0.40 | 0.20  | 0.00  | 0.41  | 0.050 | 0.56  | 0.14  | 0.97  | 0.008 |

ASAT, aspartate aminotransferase; MTX, methotrexate; SNP, single nucleotide polymorphism; Chr, chromosome; MAF, minor allele frequency; 95% CI, 95% confidence interval; P, p-value; del, deletion.

Covariates included in the linear and in the logistic GEE models are age and creatinine plasma levels at week 1.

Effect sizes and 95% CI are reported for the minor allele.

A coefficient below 0 indicates that carriers of minor allele have lower ASAT levels compared to carriers of the major allele.

The following variants are in linkage disequilibrium ( $r^2 > 0.80$ ): rs2230028 (*ABCB4*) and rs7785206 (*CROT*), all depicted variants within *CYP4B1*, *CYP1B1*, *UGT2B15*, *UGT2B7* and *ABP1*.

\* variant is also associated with MTX plasma levels at 48 hours ( $P < 0.05$ , Table S2).

**Table S7: Genetic variants associated with hemoglobin, 1 week after MTX infusion (P<0.05)**

| Gene           | SNP        | Chr | Position    | Minor allele | MAF  | Linear multivariate GEE analysis with hemoglobin levels |        |       |        | Logistic multivariate GEE analysis of CTCAE v5 anemia grade 0-1 compared to grade 2-4 |        |       |        |
|----------------|------------|-----|-------------|--------------|------|---------------------------------------------------------|--------|-------|--------|---------------------------------------------------------------------------------------|--------|-------|--------|
|                |            |     |             |              |      | Coefficient                                             | 95% CI |       | P      | Coefficient                                                                           | 95% CI |       | P      |
| <i>CYP2C8</i>  | rs1058930  | 10  | 96,818,119  | G            | 0.06 | -0.37                                                   | -0.57  | -0.18 | 0.0002 | 0.77                                                                                  | 0.36   | 1.19  | 0.0003 |
| <i>SLC22A1</i> | rs683369   | 6   | 160,551,204 | G            | 0.23 | -0.20                                                   | -0.31  | -0.08 | 0.0008 | 0.38                                                                                  | 0.13   | 0.63  | 0.003  |
| <i>CYP2C19</i> | rs4244285  | 10  | 96,541,616  | A            | 0.15 | -0.25                                                   | -0.40  | -0.10 | 0.0008 | 0.54                                                                                  | 0.22   | 0.86  | 0.001  |
| <i>CYP2C18</i> | rs2281891  | 10  | 96,493,058  | T            | 0.15 | -0.25                                                   | -0.39  | -0.10 | 0.001  | 0.54                                                                                  | 0.22   | 0.86  | 0.001  |
| <i>ABCB11</i>  | rs4148768  | 2   | 169,887,154 | T            | 0.09 | -0.28                                                   | -0.46  | -0.10 | 0.003  | 0.61                                                                                  | 0.24   | 0.98  | 0.001  |
| <i>SLC6A6</i>  | rs2341970  | 3   | 14,474,225  | T            | 0.25 | 0.20                                                    | 0.05   | 0.35  | 0.008  | -0.33                                                                                 | -0.68  | 0.03  | 0.076  |
| <i>CHST3</i>   | rs4148944  | 10  | 73,769,543  | A            | 0.11 | -0.22                                                   | -0.38  | -0.05 | 0.010  | 0.52                                                                                  | 0.16   | 0.88  | 0.005  |
| <i>SLC22A1</i> | rs628031   | 6   | 160,560,845 | A            | 0.45 | -0.13                                                   | -0.23  | -0.03 | 0.010  | 0.24                                                                                  | -0.04  | 0.52  | 0.090  |
| <i>CYP1A2</i>  | rs762551   | 15  | 75,041,917  | C            | 0.23 | 0.16                                                    | 0.04   | 0.28  | 0.012  | -0.27                                                                                 | -0.60  | 0.06  | 0.106  |
| <i>QPRT</i>    | rs3862476  | 16  | 29,687,360  | C            | 0.07 | 0.28                                                    | 0.06   | 0.50  | 0.012  | -0.83                                                                                 | -1.41  | -0.26 | 0.004  |
| <i>ABCB11</i>  | rs3770603  | 2   | 169,883,218 | A            | 0.09 | -0.24                                                   | -0.43  | -0.04 | 0.017  | 0.47                                                                                  | 0.09   | 0.86  | 0.015  |
| <i>FMO2</i>    | rs2307492  | 1   | 171,168,545 | C            | 0.07 | 0.22                                                    | 0.04   | 0.40  | 0.017  | -0.38                                                                                 | -0.98  | 0.23  | 0.221  |
| <i>CYP3A43</i> | rs17342647 | 7   | 99,459,256  | T            | 0.08 | -0.17                                                   | -0.32  | -0.03 | 0.017  | 0.48                                                                                  | 0.07   | 0.89  | 0.021  |
| <i>SLC10A2</i> | rs279941   | 13  | 103,698,168 | T            | 0.13 | -0.20                                                   | -0.36  | -0.03 | 0.017  | 0.38                                                                                  | -0.05  | 0.80  | 0.084  |
| <i>AOX1</i>    | rs16834034 | 2   | 201,542,014 | G            | 0.09 | -0.16                                                   | -0.29  | -0.03 | 0.018  | 0.28                                                                                  | -0.01  | 0.57  | 0.057  |
| <i>CYP4B1</i>  | rs4646491  | 1   | 47,280,884  | T            | 0.10 | 0.23                                                    | 0.04   | 0.42  | 0.018  | -0.67                                                                                 | -1.24  | -0.09 | 0.023  |
| <i>CYP4B1</i>  | rs3215983  | 1   | 47,280,747  | delAT        | 0.10 | 0.23                                                    | 0.04   | 0.42  | 0.018  | -0.67                                                                                 | -1.24  | -0.09 | 0.023  |
| <i>CYP11B1</i> | rs7003319  | 8   | 143,954,747 | A            | 0.42 | 0.12                                                    | 0.02   | 0.23  | 0.019  | -0.24                                                                                 | -0.52  | 0.04  | 0.089  |
| <i>CYP11B1</i> | rs1134095  | 8   | 143,954,290 | C            | 0.42 | 0.12                                                    | 0.02   | 0.23  | 0.019  | -0.24                                                                                 | -0.52  | 0.04  | 0.089  |
| <i>CYP11B1</i> | rs4736312  | 8   | 143,953,937 | T            | 0.42 | 0.12                                                    | 0.02   | 0.23  | 0.019  | -0.24                                                                                 | -0.52  | 0.04  | 0.089  |
| <i>ADH4</i>    | rs1126672  | 4   | 100,047,812 | T            | 0.26 | 0.17                                                    | 0.03   | 0.32  | 0.019  | -0.33                                                                                 | -0.68  | 0.03  | 0.069  |
| <i>CYP1B1</i>  | rs1056837  | 2   | 38,298,150  | T            | 0.42 | 0.14                                                    | 0.02   | 0.25  | 0.021  | -0.25                                                                                 | -0.56  | 0.05  | 0.104  |
| <i>QPRT</i>    | rs13331798 | 16  | 29,747,291  | G            | 0.21 | 0.16                                                    | 0.02   | 0.29  | 0.022  | -0.45                                                                                 | -0.80  | -0.10 | 0.012  |
| <i>CYP11B1</i> | rs5303     | 8   | 143,955,095 | T            | 0.42 | 0.12                                                    | 0.02   | 0.23  | 0.023  | -0.23                                                                                 | -0.52  | 0.05  | 0.102  |
| <i>SLC10A2</i> | rs188096   | 13  | 103,705,044 | T            | 0.13 | -0.19                                                   | -0.36  | -0.03 | 0.024  | 0.38                                                                                  | -0.05  | 0.81  | 0.084  |
| <i>CHST3</i>   | rs4148945  | 10  | 73,769,590  | T            | 0.49 | 0.13                                                    | 0.01   | 0.25  | 0.028  | -0.32                                                                                 | -0.62  | -0.03 | 0.032  |
| <i>SLC15A1</i> | rs1339067  | 13  | 99,356,612  | T            | 0.39 | -0.12                                                   | -0.22  | -0.01 | 0.029  | 0.41                                                                                  | 0.13   | 0.68  | 0.004  |
| <i>CYP2A13</i> | rs1709082  | 19  | 41,601,609  | G            | 0.07 | -0.19                                                   | -0.37  | -0.02 | 0.030  | 0.45                                                                                  | 0.02   | 0.88  | 0.040  |

|                |            |    |             |   |      |       |       |       |       |       |       |       |       |
|----------------|------------|----|-------------|---|------|-------|-------|-------|-------|-------|-------|-------|-------|
| <i>VKORC1</i>  | rs2884737  | 16 | 31,105,554  | G | 0.30 | 0.15  | 0.01  | 0.29  | 0.030 | -0.22 | -0.55 | 0.10  | 0.181 |
| <i>SLC7A7</i>  | rs2281677  | 14 | 23,284,572  | T | 0.39 | -0.12 | -0.24 | -0.01 | 0.030 | 0.27  | -0.01 | 0.55  | 0.057 |
| <i>CHST3</i>   | rs1871450  | 10 | 73,772,014  | A | 0.49 | 0.13  | 0.01  | 0.25  | 0.035 | -0.32 | -0.62 | -0.02 | 0.037 |
| <i>CHST3</i>   | rs4148950  | 10 | 73,771,706  | A | 0.49 | 0.13  | 0.01  | 0.25  | 0.035 | -0.32 | -0.62 | -0.02 | 0.037 |
| <i>CYP1B1</i>  | rs1056836  | 2  | 38,298,203  | G | 0.42 | 0.12  | 0.01  | 0.24  | 0.037 | -0.23 | -0.54 | 0.07  | 0.134 |
| <i>SLCO1B1</i> | rs11045819 | 12 | 21,329,813  | A | 0.25 | 0.14  | 0.01  | 0.27  | 0.038 | -0.39 | -0.72 | -0.05 | 0.024 |
| <i>SLC7A7</i>  | rs1805059  | 14 | 23,282,449  | G | 0.35 | -0.13 | -0.25 | -0.01 | 0.038 | 0.31  | 0.02  | 0.60  | 0.038 |
| <i>ADH4</i>    | rs1126670  | 4  | 100,052,733 | G | 0.28 | 0.15  | 0.01  | 0.29  | 0.039 | -0.28 | -0.61 | 0.05  | 0.101 |
| <i>ADH4</i>    | rs1126671  | 4  | 100,048,414 | A | 0.28 | 0.15  | 0.01  | 0.29  | 0.039 | -0.28 | -0.61 | 0.05  | 0.101 |
| <i>SLC7A7</i>  | rs8018462  | 14 | 23,282,110  | T | 0.44 | -0.12 | -0.23 | -0.01 | 0.040 | 0.26  | -0.02 | 0.53  | 0.068 |
| <i>GSTO1</i>   | rs4925     | 10 | 106,022,789 | A | 0.33 | -0.12 | -0.24 | -0.01 | 0.040 | 0.33  | 0.04  | 0.62  | 0.024 |
| <i>CYP26A1</i> | rs10882140 | 10 | 94,842,213  | G | 0.45 | 0.11  | 0.01  | 0.22  | 0.040 | -0.20 | -0.49 | 0.09  | 0.181 |
| <i>SULT1E1</i> | rs3736599  | 4  | 70,725,821  | A | 0.08 | 0.17  | 0.00  | 0.33  | 0.043 | -0.53 | -0.95 | -0.11 | 0.014 |
| <i>GSTM2</i>   | rs530021   | 1  | 110,210,780 | C | 0.06 | 0.23  | 0.01  | 0.46  | 0.043 | -0.84 | -1.62 | -0.06 | 0.034 |
| <i>CHST3</i>   | rs730720   | 10 | 73,772,762  | T | 0.50 | 0.12  | 0.00  | 0.24  | 0.046 | -0.29 | -0.58 | 0.00  | 0.053 |
| <i>CHST3</i>   | rs731027   | 10 | 73,772,336  | C | 0.50 | 0.12  | 0.00  | 0.24  | 0.046 | -0.29 | -0.58 | 0.00  | 0.053 |
| <i>CHST3</i>   | rs4148943  | 10 | 73,769,507  | T | 0.50 | 0.12  | 0.00  | 0.24  | 0.046 | -0.29 | -0.58 | 0.00  | 0.053 |
| <i>ABCB1</i>   | rs2214102  | 7  | 87,229,501  | A | 0.11 | -0.16 | -0.31 | 0.00  | 0.047 | 0.17  | -0.26 | 0.60  | 0.433 |
| <i>GSTP1</i>   | rs1695     | 11 | 67,352,689  | G | 0.36 | 0.12  | 0.00  | 0.23  | 0.049 | -0.17 | -0.49 | 0.14  | 0.274 |

MTX, methotrexate; SNP, single nucleotide polymorphism; Chr, chromosome; MAF, minor allele frequency; 95% CI, 95% confidence interval; P, p-value; del, deletion.

Covariates included in the linear GEE model are sex, MTX cumulative and creatinine plasma levels at week 1. Covariates included in the logistic GEE model are sex, age and creatinine plasma levels at week 1.

Effect sizes and 95% CI are reported for the minor allele.

A coefficient below 0 indicates that carriers of minor allele have lower hemoglobin levels compared to carriers of the major allele.

The following variants are in linkage disequilibrium ( $r^2 > 0.80$ ): all depicted variants within *CYP4B1*, *ABCB11*, *CYP1B1*, *ADH4*, *CYP11B1*, *CHST3* (except rs4148944), *SLC10A2* and *SLC7A7* (except rs8018462).

\* variant is also associated with MTX plasma levels at 48 hours ( $P < 0.05$ , Table S2).

**Table S8: Genetic variants associated with thrombocyte counts, 1 week after MTX infusion (P<0.05)**

| Gene           | SNP        | Chr | Position    | Minor allele | MAF  | Linear multivariate GEE analysis with thrombocyte counts |        |       |         | Logistic multivariate GEE analysis of CTCAE v5 platelet count decrease, grade 0 compared to grade 1-4 |        |       |       |
|----------------|------------|-----|-------------|--------------|------|----------------------------------------------------------|--------|-------|---------|-------------------------------------------------------------------------------------------------------|--------|-------|-------|
|                |            |     |             |              |      | Coefficient                                              | 95% CI |       | P       | Coefficient                                                                                           | 95% CI |       | P     |
| <i>CYP2B6</i>  | rs4803418  | 19  | 41,511,803  | G            | 0.31 | -0.19                                                    | -0.27  | -0.10 | 0.00003 | 0.32                                                                                                  | 0.01   | 0.63  | 0.046 |
| <i>CYP4F8</i>  | rs4808326  | 19  | 15,726,147  | A            | 0.10 | 0.19                                                     | 0.10   | 0.29  | 0.00006 | -0.97                                                                                                 | -1.55  | -0.39 | 0.001 |
| <i>CYP2B6</i>  | rs4803419  | 19  | 41,512,792  | T            | 0.32 | -0.19                                                    | -0.28  | -0.09 | 0.00009 | 0.32                                                                                                  | 0.00   | 0.65  | 0.051 |
| <i>SLC13A1</i> | rs6962039  | 7   | 122,754,358 | T            | 0.24 | -0.18                                                    | -0.29  | -0.07 | 0.001   | 0.59                                                                                                  | 0.22   | 0.95  | 0.002 |
| <i>FMO2</i>    | rs2020870  | 1   | 171,154,959 | G            | 0.08 | 0.23                                                     | 0.09   | 0.37  | 0.001   | -0.74                                                                                                 | -1.31  | -0.17 | 0.011 |
| <i>CYP2B6</i>  | rs2279343  | 19  | 41,515,263  | G            | 0.30 | 0.16                                                     | 0.05   | 0.27  | 0.003   | -0.28                                                                                                 | -0.67  | 0.11  | 0.165 |
| <i>SLC7A8</i>  | rs2268877  | 14  | 23,636,757  | C            | 0.22 | -0.17                                                    | -0.29  | -0.06 | 0.004   | 0.49                                                                                                  | 0.08   | 0.89  | 0.018 |
| <i>NR1I2</i>   | rs2276707  | 3   | 119,534,153 | T            | 0.18 | 0.15                                                     | 0.05   | 0.26  | 0.004   | -0.64                                                                                                 | -1.10  | -0.17 | 0.007 |
| <i>SLC16A1</i> | rs9429505  | 1   | 113,454,571 | C            | 0.24 | -0.17                                                    | -0.29  | -0.05 | 0.005   | 0.44                                                                                                  | 0.06   | 0.81  | 0.023 |
| <i>CYP4F11</i> | rs1060463  | 19  | 16,025,176  | G            | 0.42 | -0.13                                                    | -0.22  | -0.04 | 0.006   | 0.46                                                                                                  | 0.12   | 0.81  | 0.008 |
| <i>CYP4F11</i> | rs3765070  | 19  | 16,040,292  | T            | 0.41 | -0.13                                                    | -0.22  | -0.04 | 0.007   | 0.45                                                                                                  | 0.11   | 0.79  | 0.010 |
| <i>ADH4</i>    | rs1126672  | 4   | 100,047,812 | T            | 0.26 | 0.16                                                     | 0.04   | 0.27  | 0.007   | -0.47                                                                                                 | -0.86  | -0.07 | 0.020 |
| <i>FMO3</i>    | rs1736557  | 1   | 171,080,080 | A            | 0.10 | 0.16                                                     | 0.04   | 0.28  | 0.008   | -0.46                                                                                                 | -0.98  | 0.05  | 0.078 |
| <i>SULT2B1</i> | rs2302948  | 19  | 49,096,065  | T            | 0.23 | -0.19                                                    | -0.33  | -0.05 | 0.008   | 0.69                                                                                                  | 0.23   | 1.15  | 0.003 |
| <i>UGT1A9</i>  | rs3832043  | 2   | 234,580,463 | T            | 0.38 | 0.16                                                     | 0.04   | 0.29  | 0.009   | -0.44                                                                                                 | -0.81  | -0.06 | 0.022 |
| <i>SLC28A1</i> | rs2305367  | 15  | 85,476,441  | A            | 0.41 | -0.14                                                    | -0.24  | -0.03 | 0.009   | 0.42                                                                                                  | 0.08   | 0.77  | 0.016 |
| <i>ABCC5</i>   | rs939336   | 3   | 183,685,534 | T            | 0.39 | -0.11                                                    | -0.19  | -0.02 | 0.012   | 0.24                                                                                                  | -0.07  | 0.55  | 0.130 |
| <i>CYP2B6</i>  | rs8192719  | 19  | 41,518,773  | T            | 0.25 | 0.14                                                     | 0.03   | 0.25  | 0.015   | -0.20                                                                                                 | -0.59  | 0.19  | 0.317 |
| <i>CYP2B6</i>  | rs3745274  | 19  | 41,512,841  | T            | 0.26 | 0.14                                                     | 0.03   | 0.25  | 0.015   | -0.23                                                                                                 | -0.62  | 0.17  | 0.267 |
| <i>ADH1A</i>   | rs6811453  | 4   | 100,194,977 | T            | 0.38 | 0.13                                                     | 0.02   | 0.23  | 0.015   | -0.31                                                                                                 | -0.67  | 0.05  | 0.087 |
| <i>ADH1A</i>   | rs1826909  | 4   | 100,217,743 | A            | 0.38 | 0.13                                                     | 0.02   | 0.23  | 0.017   | -0.31                                                                                                 | -0.66  | 0.05  | 0.091 |
| <i>ABP1</i>    | rs12539    | 7   | 150,558,366 | T            | 0.21 | 0.14                                                     | 0.02   | 0.26  | 0.018   | -0.38                                                                                                 | -0.80  | 0.05  | 0.083 |
| <i>ADH4</i>    | rs1126670  | 4   | 100,052,733 | G            | 0.28 | 0.14                                                     | 0.02   | 0.25  | 0.019   | -0.37                                                                                                 | -0.77  | 0.03  | 0.070 |
| <i>ADH4</i>    | rs1126671  | 4   | 100,048,414 | A            | 0.28 | 0.14                                                     | 0.02   | 0.25  | 0.019   | -0.37                                                                                                 | -0.77  | 0.03  | 0.070 |
| <i>CYP4F11</i> | rs2305801  | 19  | 16,045,141  | A            | 0.20 | -0.13                                                    | -0.23  | -0.02 | 0.020   | 0.42                                                                                                  | 0.04   | 0.80  | 0.029 |
| <i>CYP4F11</i> | rs8104361  | 19  | 16,034,714  | T            | 0.20 | -0.13                                                    | -0.25  | -0.02 | 0.022   | 0.37                                                                                                  | -0.03  | 0.78  | 0.068 |
| <i>CYP2C19</i> | rs12248560 | 10  | 96,521,657  | T            | 0.27 | 0.12                                                     | 0.02   | 0.21  | 0.022   | -0.30                                                                                                 | -0.67  | 0.08  | 0.119 |
| <i>ALB</i>     | rs3756067  | 4   | 74,269,645  | A            | 0.39 | -0.12                                                    | -0.22  | -0.02 | 0.024   | 0.58                                                                                                  | 0.23   | 0.93  | 0.001 |

|                |            |    |             |   |      |       |       |       |       |       |       |       |       |
|----------------|------------|----|-------------|---|------|-------|-------|-------|-------|-------|-------|-------|-------|
| <i>ABCC5</i>   | rs7636910  | 3  | 183,699,516 | G | 0.42 | 0.11  | 0.01  | 0.20  | 0.025 | -0.18 | -0.50 | 0.14  | 0.274 |
| <i>GSTM2</i>   | rs530021   | 1  | 110,210,780 | C | 0.06 | 0.18  | 0.02  | 0.34  | 0.025 | -0.98 | -1.75 | -0.21 | 0.013 |
| <i>SLC5A6</i>  | rs1395     | 2  | 27,424,636  | C | 0.32 | 0.11  | 0.01  | 0.20  | 0.027 | -0.22 | -0.55 | 0.11  | 0.192 |
| <i>FMO2</i>    | rs2020863  | 1  | 171,174,531 | G | 0.07 | -0.22 | -0.43 | -0.02 | 0.031 | 0.48  | -0.26 | 1.22  | 0.203 |
| <i>ADH5</i>    | rs1154400  | 4  | 100,010,010 | G | 0.29 | 0.12  | 0.01  | 0.23  | 0.034 | -0.38 | -0.74 | -0.02 | 0.036 |
| <i>CYP2F1</i>  | rs58285195 | 19 | 41,622,205  | C | 0.05 | -0.27 | -0.53 | -0.02 | 0.035 | 0.91  | 0.11  | 1.72  | 0.025 |
| <i>SLC7A8</i>  | rs1884545  | 14 | 23,652,004  | T | 0.10 | -0.16 | -0.32 | -0.01 | 0.036 | 0.32  | -0.26 | 0.90  | 0.276 |
| <i>CYP1B1</i>  | rs1056837  | 2  | 38,298,150  | T | 0.42 | 0.11  | 0.01  | 0.22  | 0.038 | -0.16 | -0.51 | 0.19  | 0.378 |
| <i>FMO2</i>    | rs2020869  | 1  | 171,178,152 | G | 0.12 | 0.15  | 0.01  | 0.30  | 0.040 | -0.48 | -1.03 | 0.06  | 0.084 |
| <i>HNMT</i>    | rs4646333  | 2  | 138,773,229 | A | 0.22 | -0.13 | -0.25 | -0.01 | 0.040 | 0.32  | -0.08 | 0.73  | 0.120 |
| <i>HNMT</i>    | rs1050891  | 2  | 138,771,760 | G | 0.22 | -0.13 | -0.25 | -0.01 | 0.040 | 0.32  | -0.08 | 0.73  | 0.120 |
| <i>CYP19A1</i> | rs10046    | 15 | 51,502,986  | C | 0.49 | -0.12 | -0.24 | -0.01 | 0.041 | 0.64  | 0.23  | 1.05  | 0.002 |
| <i>SLC22A2</i> | rs624249   | 6  | 160,679,400 | T | 0.42 | -0.11 | -0.22 | 0.00  | 0.042 | 0.47  | 0.09  | 0.86  | 0.016 |
| <i>ADH1A</i>   | rs12512110 | 4  | 100,195,815 | A | 0.08 | -0.17 | -0.34 | -0.01 | 0.043 | 0.37  | -0.26 | 1.00  | 0.250 |
| <i>CYP4F8</i>  | rs2056822  | 19 | 15,739,597  | A | 0.29 | 0.11  | 0.00  | 0.21  | 0.044 | -0.34 | -0.70 | 0.01  | 0.060 |
| <i>CYP4F8</i>  | rs4239614  | 19 | 15,740,220  | C | 0.29 | 0.11  | 0.00  | 0.21  | 0.044 | -0.35 | -0.71 | 0.01  | 0.055 |
| <i>HNMT</i>    | rs4245861  | 2  | 138,772,694 | T | 0.23 | -0.13 | -0.25 | 0.00  | 0.047 | 0.33  | -0.08 | 0.74  | 0.119 |
| <i>UGT2B7</i>  | rs28365062 | 4  | 69,964,271  | G | 0.10 | 0.14  | 0.00  | 0.29  | 0.047 | -0.59 | -1.17 | -0.01 | 0.045 |

MTX, methotrexate; SNP, single nucleotide polymorphism; Chr, chromosome; MAF, minor allele frequency; 95% CI, 95% confidence interval; P, p-value.

Covariates included in linear GEE model are sex and creatinine plasma levels at week 1. Covariate included in the logistic GEE model is creatinine plasma levels at week 1.

Effect sizes and 95% CI are reported for the minor allele.

A coefficient below 0 indicates that carriers of minor allele have lower thrombocyte counts compared to carriers of the major allele.

Variants depicted in bold surpass the Bonferroni corrected p-value threshold of  $9.2 \times 10^{-5}$ .

The following variants are in linkage disequilibrium ( $r^2 > 0.80$ ): rs1126672 (*ADH4*) and rs115440 (*ADH5*), rs4803418 and rs4803419 (*CYP2B6*), rs1060463 and rs3765070 (*CYP4F11*), rs2305801 and rs8104361 (*CYP4F11*), all depicted variants within *HNMT*, *ADH1A*, *ADH4* and *CYP4F8* (except rs4808326).

\* variant is also associated with MTX plasma levels at 48 hours ( $P < 0.05$ , Table S2).

**Table S9: Genetic variants associated with leucocyte counts, 1 week after MTX infusion (P<0.05)**

| Gene           | SNP        | Chr | Position    | Minor allele | MAF  | Linear multivariate GEE analysis with leukocyte counts |        |       |        | Logistic multivariate GEE analysis of CTCAE v5 white blood cell decrease, grade 0-1 compared to grade 2-4 |        |       |       |
|----------------|------------|-----|-------------|--------------|------|--------------------------------------------------------|--------|-------|--------|-----------------------------------------------------------------------------------------------------------|--------|-------|-------|
|                |            |     |             |              |      | Coefficient                                            | 95% CI |       | P      | Coefficient                                                                                               | 95% CI |       | P     |
| <i>CYP2B6</i>  | rs4803418  | 19  | 41,511,803  | G            | 0.31 | -0.12                                                  | -0.19  | -0.06 | 0.0003 | 0.36                                                                                                      | 0.06   | 0.66  | 0.019 |
| <i>ALB</i>     | rs3756067  | 4   | 74,269,645  | A            | 0.39 | -0.13                                                  | -0.21  | -0.06 | 0.0007 | 0.62                                                                                                      | 0.23   | 1.00  | 0.002 |
| <i>CYP2B6</i>  | rs4803419  | 19  | 41,512,792  | T            | 0.32 | -0.11                                                  | -0.18  | -0.04 | 0.003  | 0.24                                                                                                      | -0.07  | 0.55  | 0.133 |
| <i>GSTZ1</i>   | rs7972     | 14  | 77,793,237  | A            | 0.08 | 0.18                                                   | 0.06   | 0.30  | 0.004  | -0.70                                                                                                     | -1.30  | -0.11 | 0.020 |
| <i>ABCC6</i>   | rs8058696  | 16  | 16,278,869  | C            | 0.42 | 0.10                                                   | 0.03   | 0.17  | 0.008  | -0.38                                                                                                     | -0.76  | -0.01 | 0.044 |
| <i>CYP2F1</i>  | rs58285195 | 19  | 41,622,205  | C            | 0.05 | -0.24                                                  | -0.42  | -0.06 | 0.009  | 0.97                                                                                                      | 0.39   | 1.56  | 0.001 |
| <i>UGT2B15</i> | rs1902023  | 4   | 69,536,084  | T            | 0.50 | 0.10                                                   | 0.03   | 0.18  | 0.009  | -0.38                                                                                                     | -0.73  | -0.03 | 0.035 |
| <i>NR1I2</i>   | rs3814055  | 3   | 119,500,035 | T            | 0.35 | 0.09                                                   | 0.02   | 0.16  | 0.009  | -0.55                                                                                                     | -0.87  | -0.23 | 0.001 |
| <i>UGT2B4</i>  | rs1131878  | 4   | 70,345,904  | G            | 0.38 | -0.10                                                  | -0.17  | -0.02 | 0.013  | 0.35                                                                                                      | 0.03   | 0.68  | 0.035 |
| <i>SLCO5A1</i> | rs1138541  | 8   | 70,584,628  | A            | 0.26 | -0.11                                                  | -0.19  | -0.02 | 0.014  | 0.46                                                                                                      | 0.11   | 0.81  | 0.009 |
| <i>ABCC6</i>   | rs8058694  | 16  | 16,278,863  | C            | 0.42 | 0.09                                                   | 0.02   | 0.17  | 0.017  | -0.37                                                                                                     | -0.74  | 0.00  | 0.052 |
| <i>PTGIS</i>   | rs5629     | 20  | 48,129,706  | A            | 0.24 | 0.10                                                   | 0.02   | 0.19  | 0.017  | -0.51                                                                                                     | -0.92  | -0.11 | 0.013 |
| <i>NAT2</i>    | rs1041983  | 8   | 18,257,795  | T            | 0.36 | -0.09                                                  | -0.17  | -0.01 | 0.031  | 0.44                                                                                                      | 0.08   | 0.80  | 0.015 |
| <i>VKORC1</i>  | rs2884737  | 16  | 31,105,554  | G            | 0.30 | 0.09                                                   | 0.01   | 0.18  | 0.037  | -0.32                                                                                                     | -0.67  | 0.02  | 0.069 |
| <i>SLC13A1</i> | rs6962039  | 7   | 122,754,358 | T            | 0.24 | -0.10                                                  | -0.20  | -0.01 | 0.037  | 0.38                                                                                                      | 0.00   | 0.76  | 0.050 |
| <i>ADH6</i>    | rs6830685  | 4   | 100,143,184 | C            | 0.21 | -0.10                                                  | -0.19  | 0.00  | 0.039  | 0.17                                                                                                      | -0.22  | 0.56  | 0.404 |
| <i>GSTM3</i>   | rs1799735  | 1   | 110,280,254 | delAGG       | 0.12 | 0.13                                                   | 0.01   | 0.25  | 0.041  | -0.57                                                                                                     | -1.36  | 0.22  | 0.159 |
| <i>UGT2B4</i>  | rs13119049 | 4   | 70,346,565  | A            | 0.31 | -0.09                                                  | -0.18  | 0.00  | 0.046  | 0.37                                                                                                      | 0.00   | 0.73  | 0.050 |
| <i>SPG7</i>    | rs2292954  | 16  | 89,613,123  | G            | 0.22 | -0.08                                                  | -0.16  | 0.00  | 0.049  | 0.24                                                                                                      | -0.11  | 0.58  | 0.174 |
| <i>HNMT</i>    | rs4245861  | 2   | 138,772,694 | T            | 0.23 | -0.09                                                  | -0.19  | 0.00  | 0.049  | 0.18                                                                                                      | -0.21  | 0.58  | 0.365 |
| <i>UGT2B4</i>  | rs13142440 | 4   | 70,346,564  | A            | 0.31 | -0.09                                                  | -0.18  | 0.00  | 0.049  | 0.37                                                                                                      | 0.00   | 0.74  | 0.049 |

MTX, methotrexate; SNP, single nucleotide polymorphism; Chr, chromosome; MAF, minor allele frequency; 95% CI, 95% confidence interval; P, p-value; del, deletion.

Covariates included in the linear and the logistic GEE model are age and creatinine plasma levels at week 1.

Effect sizes and 95% CI are reported for the minor allele.

A coefficient below 0 indicates that carriers of minor allele have lower leukocyte counts compared to carriers of the major allele.

The following variants are in linkage disequilibrium ( $r^2 > 0.80$ ): all depicted variants within *ABCC6*, *CYP2B6* and *UGT2B4* (except rs1131878).

\* variant is also associated with MTX plasma levels at 48 hours (P<0.05, Table S2).



**Table S10: Genetic variants associated with neutrophil counts, 1 week after MTX infusion (P<0.05)**

| Gene           | SNP        | Chr | Position    | Minor allele | MAF  | Linear multivariate GEE analysis with neutrophil counts |        |       |        | Logistic multivariate GEE analysis of CTCAE v5 neutrophil count decrease, grade 0-2 compared to grade 3-4 |        |       |        |
|----------------|------------|-----|-------------|--------------|------|---------------------------------------------------------|--------|-------|--------|-----------------------------------------------------------------------------------------------------------|--------|-------|--------|
|                |            |     |             |              |      | Coefficient                                             | 95% CI |       | P      | Coefficient                                                                                               | 95% CI |       | P      |
| <i>PTGIS</i>   | rs5629     | 20  | 48,129,706  | A            | 0.24 | 0.19                                                    | 0.08   | 0.29  | 0.0008 | -0.63                                                                                                     | -1.09  | -0.17 | 0.007  |
| <i>UGT2B4</i>  | rs1131878  | 4   | 70,345,904  | G            | 0.38 | -0.16                                                   | -0.25  | -0.07 | 0.0008 | 0.50                                                                                                      | 0.12   | 0.88  | 0.010  |
| <i>UGT2B4</i>  | rs13119049 | 4   | 70,346,565  | A            | 0.31 | -0.17                                                   | -0.28  | -0.06 | 0.002  | 0.54                                                                                                      | 0.13   | 0.96  | 0.011  |
| <i>ALB</i>     | rs3756067  | 4   | 74,269,645  | A            | 0.39 | -0.17                                                   | -0.28  | -0.06 | 0.003  | 0.53                                                                                                      | 0.14   | 0.93  | 0.008  |
| <i>UGT2B4</i>  | rs13142440 | 4   | 70,346,564  | A            | 0.31 | -0.17                                                   | -0.28  | -0.06 | 0.003  | 0.52                                                                                                      | 0.10   | 0.94  | 0.015  |
| <i>UGT2B4</i>  | rs1966151  | 4   | 70,346,127  | C            | 0.25 | 0.15                                                    | 0.05   | 0.26  | 0.005  | -0.41                                                                                                     | -0.86  | 0.05  | 0.080  |
| <i>ADH6</i>    | rs6830685  | 4   | 100,143,184 | C            | 0.21 | -0.18                                                   | -0.31  | -0.05 | 0.005  | 0.74                                                                                                      | 0.35   | 1.12  | 0.000  |
| <i>CYP2B6</i>  | rs4803418  | 19  | 41,511,803  | G            | 0.31 | -0.14                                                   | -0.24  | -0.04 | 0.007  | 0.22                                                                                                      | -0.14  | 0.57  | 0.227  |
| <i>CA5P</i>    | rs1364182  | 16  | 29,656,093  | T            | 0.07 | 0.25                                                    | 0.07   | 0.43  | 0.007  | -0.37                                                                                                     | -1.06  | 0.32  | 0.296  |
| <i>SLCO5A1</i> | rs1138541  | 8   | 70,584,628  | A            | 0.26 | -0.17                                                   | -0.29  | -0.05 | 0.007  | 0.25                                                                                                      | -0.17  | 0.68  | 0.239  |
| <i>CYP2A13</i> | rs1709082  | 19  | 41,601,609  | G            | 0.07 | -0.20                                                   | -0.35  | -0.05 | 0.008  | 0.59                                                                                                      | 0.03   | 1.15  | 0.040  |
| <i>CYP4Z1</i>  | rs7512729  | 1   | 47,578,471  | C            | 0.41 | 0.14                                                    | 0.04   | 0.25  | 0.009  | -0.32                                                                                                     | -0.68  | 0.04  | 0.080  |
| <i>NR1I2</i>   | rs3814055  | 3   | 119,500,035 | T            | 0.35 | 0.14                                                    | 0.04   | 0.25  | 0.009  | -0.55                                                                                                     | -1.00  | -0.09 | 0.019  |
| <i>CDA</i>     | rs2072671  | 1   | 20,915,701  | C            | 0.33 | -0.15                                                   | -0.26  | -0.04 | 0.010  | 0.20                                                                                                      | -0.17  | 0.57  | 0.288  |
| <i>CDA</i>     | rs2072671  | 1   | 20,915,701  | C            | 0.33 | -0.15                                                   | -0.26  | -0.04 | 0.010  | 0.20                                                                                                      | -0.17  | 0.57  | 0.288  |
| <i>CA5P</i>    | rs11150564 | 16  | 29,666,736  | T            | 0.44 | -0.14                                                   | -0.24  | -0.03 | 0.012  | 0.56                                                                                                      | 0.17   | 0.96  | 0.005  |
| <i>ADH6</i>    | rs10002894 | 4   | 100,141,240 | C            | 0.22 | -0.16                                                   | -0.29  | -0.03 | 0.015  | 0.74                                                                                                      | 0.35   | 1.13  | 0.0002 |
| <i>CYP2B6</i>  | rs4803419  | 19  | 41,512,792  | T            | 0.32 | -0.12                                                   | -0.22  | -0.01 | 0.026  | 0.18                                                                                                      | -0.18  | 0.53  | 0.327  |
| <i>CHST1</i>   | rs9787901  | 11  | 45,696,153  | T            | 0.08 | 0.21                                                    | 0.02   | 0.40  | 0.028  | -0.97                                                                                                     | -1.84  | -0.10 | 0.029  |
| <i>CYP2F1</i>  | rs58285195 | 19  | 41,622,205  | C            | 0.05 | -0.32                                                   | -0.60  | -0.03 | 0.030  | 0.92                                                                                                      | 0.20   | 1.64  | 0.013  |
| <i>UGT2B15</i> | rs1902023  | 4   | 69,536,084  | T            | 0.50 | 0.14                                                    | 0.01   | 0.26  | 0.030  | -0.36                                                                                                     | -0.79  | 0.07  | 0.099  |
| <i>CYP2S1</i>  | rs338599   | 19  | 41,700,493  | G            | 0.05 | 0.30                                                    | 0.02   | 0.58  | 0.034  | -0.48                                                                                                     | -1.44  | 0.48  | 0.325  |
| <i>SLC22A1</i> | rs628031   | 6   | 160,560,845 | A            | 0.45 | -0.12                                                   | -0.24  | -0.01 | 0.038  | 0.22                                                                                                      | -0.20  | 0.65  | 0.304  |
| <i>QPRT</i>    | rs13331798 | 16  | 29,747,291  | G            | 0.21 | 0.14                                                    | 0.01   | 0.27  | 0.039  | -0.63                                                                                                     | -1.12  | -0.14 | 0.011  |
| <i>SLC10A1</i> | rs4646285  | 14  | 70,263,648  | A            | 0.09 | 0.22                                                    | 0.01   | 0.42  | 0.042  | -0.37                                                                                                     | -1.20  | 0.46  | 0.378  |
| <i>CYP4F11</i> | rs2305801  | 19  | 16,045,141  | A            | 0.20 | -0.14                                                   | -0.27  | 0.00  | 0.044  | 0.52                                                                                                      | 0.07   | 0.97  | 0.023  |
| <i>ABCC6</i>   | rs8058696  | 16  | 16,278,869  | C            | 0.42 | 0.12                                                    | 0.00   | 0.23  | 0.049  | -0.35                                                                                                     | -0.80  | 0.09  | 0.122  |
| <i>SLC28A1</i> | rs2290272  | 15  | 85,447,431  | A            | 0.32 | -0.11                                                   | -0.23  | 0.00  | 0.049  | 0.35                                                                                                      | -0.04  | 0.74  | 0.080  |

MTX, methotrexate; SNP, single nucleotide polymorphism; Chr, chromosome; MAF, minor allele frequency; 95% CI, 95% confidence interval; P, p-value.

Covariates included in linear GEE model are MTX cumulative dose and creatinine plasma levels at week 1. Covariate included in the logistic GEE model is creatinine plasma levels at week 1.

Effect sizes and 95% CI are reported for the minor allele.

A coefficient below 0 indicates that carriers of minor allele have lower neutrophil counts compared to carriers of the major allele.

The following variants are in linkage disequilibrium ( $r^2 > 0.80$ ): rs13119094 and rs13142440 (*UGT2B4*), all depicted variants within *ADH6* and *CYP2B6*.

\* variant is also associated with MTX plasma levels at 48 hours ( $P < 0.05$ , Table S2).

**Table S11: National Cancer Institute Common Terminology Criteria for Adverse Events (CTCAE) Version 5.0, used to grade laboratory toxicity markers**

| CTCAE Term                                  | Grade 0                                                               | Grade 1                                                                                | Grade 2                                                                                 | Grade 3                                                                                   | Grade 4                                                                       | Grade 5 |
|---------------------------------------------|-----------------------------------------------------------------------|----------------------------------------------------------------------------------------|-----------------------------------------------------------------------------------------|-------------------------------------------------------------------------------------------|-------------------------------------------------------------------------------|---------|
| <b>Alanine aminotransferase increased</b>   | <ULN if baseline was normal; <1.5 x baseline if baseline was abnormal | >ULN - 3.0 x ULN if baseline was normal; 1.5 - 3.0 x baseline if baseline was abnormal | >3.0 - 5.0 x ULN if baseline was normal; >3.0 - 5.0 x baseline if baseline was abnormal | >5.0 - 20.0 x ULN if baseline was normal; >5.0 - 20.0 x baseline if baseline was abnormal | >20.0 x ULN if baseline was normal; >20.0 x baseline if baseline was abnormal | -       |
| <b>Aspartate aminotransferase increased</b> | <ULN if baseline was normal; <1.5 x baseline if baseline was abnormal | >ULN - 3.0 x ULN if baseline was normal; 1.5 - 3.0 x baseline if baseline was abnormal | >3.0 - 5.0 x ULN if baseline was normal; >3.0 - 5.0 x baseline if baseline was abnormal | >5.0 - 20.0 x ULN if baseline was normal; >5.0 - 20.0 x baseline if baseline was abnormal | >20.0 x ULN if baseline was normal; >20.0 x baseline if baseline was abnormal | -       |
| <b>Anemia</b>                               | Hgb >LLN                                                              | Hgb <LLN - 10.0 g/dL; <LLN - 6.2 mmol/L; <LLN - 100 g/L                                | Hgb <10.0 - 8.0 g/dL; <6.2 - 4.9 mmol/L; <100 - 80 g/L                                  | Hgb <8.0 g/dL; <4.9 mmol/L; <80 g/L; transfusion indicated                                | Life-threatening consequences; urgent intervention indicated                  | Death   |
| <b>Platelet count decreased</b>             | >LLN                                                                  | <LLN - 75,000/mm <sup>3</sup> ; <LLN - 75.0 x 10 <sup>9</sup> / L                      | <75,000 - 50,000/mm <sup>3</sup> ; <75.0 - 50.0 x 10 <sup>9</sup> / L                   | <50,000 - 25,000/mm <sup>3</sup> ; <50.0 - 25.0 x 10 <sup>9</sup> / L                     | <25,000/mm <sup>3</sup> ; <25.0 x 10 <sup>9</sup> / L                         | -       |
| <b>White blood cell decreased</b>           | >LLN                                                                  | <LLN - 3000/mm <sup>3</sup> ; <LLN - 3.0 x 10 <sup>9</sup> / L                         | <3000 - 2000/mm <sup>3</sup> ; <3.0 - 2.0 x 10 <sup>9</sup> / L                         | <2000 - 1000/mm <sup>3</sup> ; <2.0 - 1.0 x 10 <sup>9</sup> / L                           | <1000/mm <sup>3</sup> ; <1.0 - 10 <sup>9</sup> / L                            | -       |
| <b>Neutrophil count decreased</b>           | >LLN                                                                  | <LLN - 1500/mm <sup>3</sup> ; <LLN - 1.5 x 10 <sup>9</sup> / L                         | <1500-1000/mm <sup>3</sup> ; <1.5 - 1.0 x 10 <sup>9</sup> / L                           | <1000 - 500/mm <sup>3</sup> ; <1.0 - 0.5 x 10 <sup>9</sup> / L                            | <500/mm <sup>3</sup> ; <0.5 - 10 <sup>9</sup> / L                             | -       |
| <b>Creatinine increased</b>                 | <ULN                                                                  | >ULN - 1.5 x ULN                                                                       | >1.5 - 3.0 x baseline; >1.5 - 3.0 x ULN                                                 | >3.0 x baseline; >3.0 - 6.0 x ULN                                                         | >6.0 x ULN                                                                    | -       |

ULN, upper limit of normal; LLN, lower limit of normal; Hgb, hemoglobin.

Grades depicted by a green cell are considered ‘controls’ in binary genetic association analyses. Grades depicted by a red cell are considered ‘cases’.
